# Supplementary material for: Fucoxanthin alleviates lipopolysaccharide-induced intestinal barrier injury in mice
Source: Royal Society of Chemistry journal article supplement (doi:10.1039/d4fo00611a), 2024-01-01

## Supplementary Information

### **Fucoxanthin alleviates lipopolysaccharide-induced intestinal barrier injury in mice**

Lei Du <sup>a, b#</sup>, Chen Chen <sup>b#</sup>, Yu-Hong Yang <sup>c</sup>, Yan Zheng <sup>d</sup>, Hui Li <sup>a, b</sup>, Zi-Jian Wu <sup>a, b</sup>, Hao Wu <sup>a, b</sup>, Kazuo Miyashita <sup>e</sup>, Guo-Hai Su <sup>d\*</sup>

<sup>a</sup> Research Center of Translational Medicine, Jinan Central Hospital, Shandong University, No.105 Jiefang Road, Jinan, Shandong, 250013, China.

<sup>b</sup> Department of Nutrition and Food Hygiene, School of Public Health, Cheeloo College of Medicine, Shandong University, No.44 Wenhuxi Road, Jinan, Shandong, 250012, China.

<sup>c</sup> School of Food Science and Engineering, Qilu University of Technology (Shandong Academy of Sciences), No.3501 Daxue Road, Jinan, Shandong, 250353, China.

<sup>d</sup> Research Center of Translational Medicine, Central Hospital Affiliated to Shandong First Medical University, No.105 Jiefang Road, Jinan, Shandong, 250013, China.

<sup>e</sup> Center for Industry-University Collaboration, Obihiro University of Agriculture and Veterinary Medicine, Inada-cho, Obihiro, Hokkaido, 080-8555, Japan.

<sup>#</sup> These authors contributed equally to this work.

<sup>\*</sup> Correspondence author:

Prof. Guo-Hai Su, E-mail address: gttstg@163.com.

**Table S1** Colonic histopathology scoring criteria.

**Figure S1** Original Western blotting images presented in this study.

**Table S1** Colonic histopathology scoring criteria

| Score | Inflammation | Mucosal damage        | Crypt damage         | Range of lesions (%) |
|-------|--------------|-----------------------|----------------------|----------------------|
| 0     | None         | None                  | None                 | 0                    |
| 1     | Mild         | Mucous layer          | 1/3                  | 1~25                 |
| 2     | Moderate     | Submucosa             | 2/3                  | 26~50                |
| 3     | Severe       | Muscularis and serosa | 100%                 | 51~75                |
| 4     | -            | -                     | 100%+epithelium loss | 76~100               |

**Figure S1** Original Western blotting images presented in this study.

Uncropped blots for **Figure 2E**

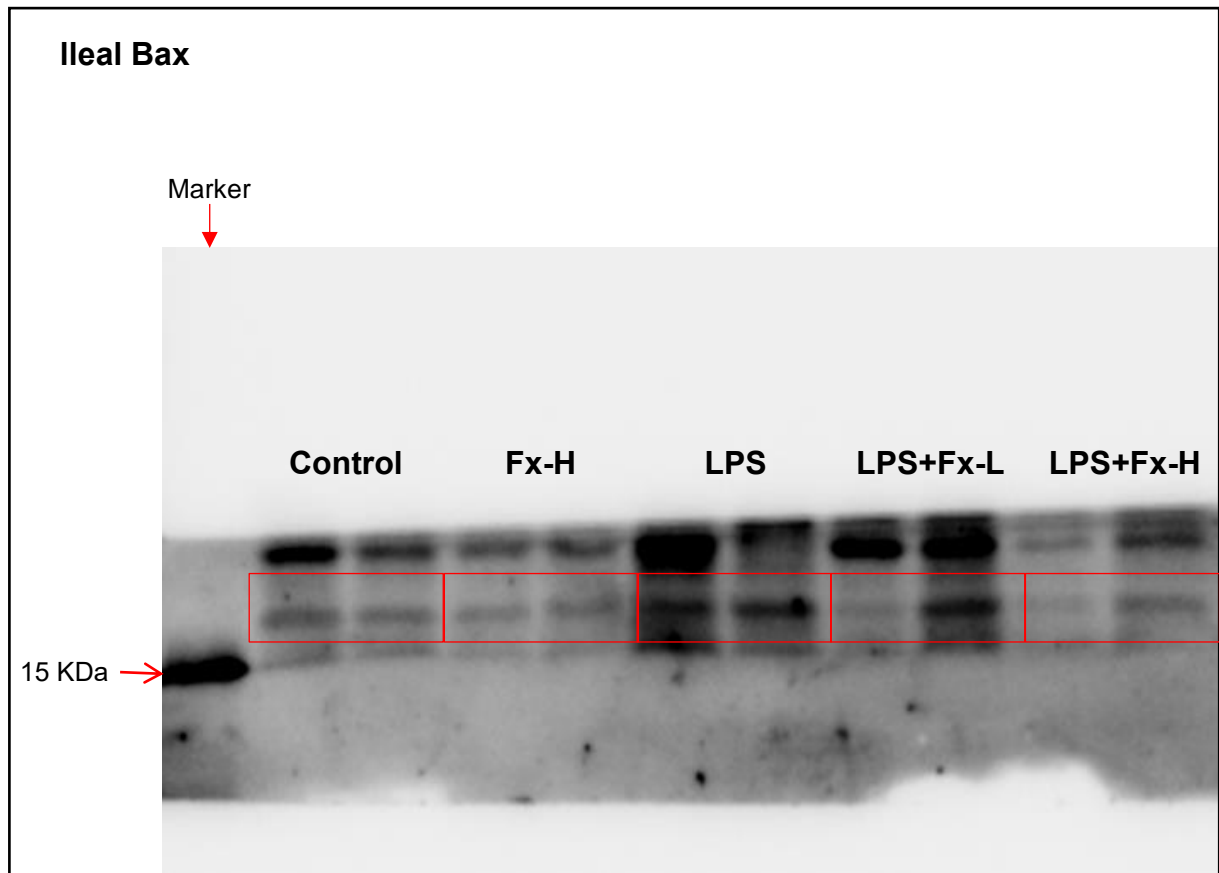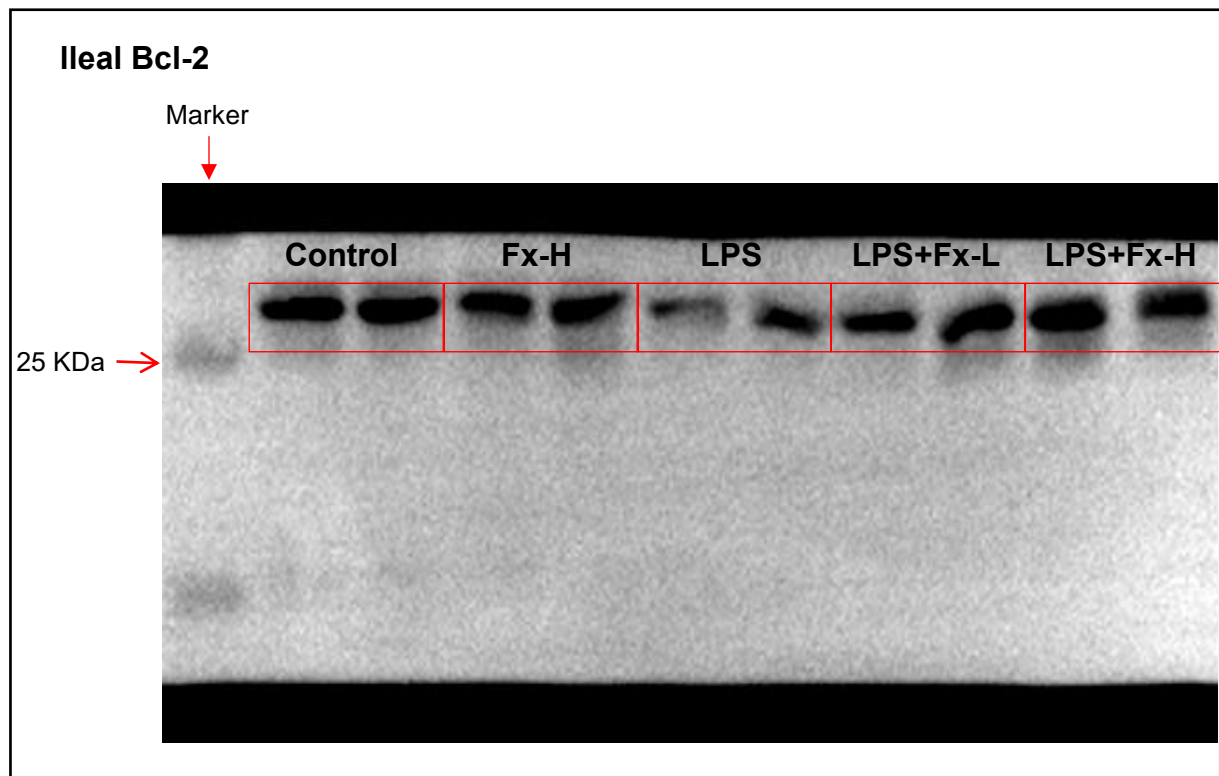

### Ileal cleaved caspase-3

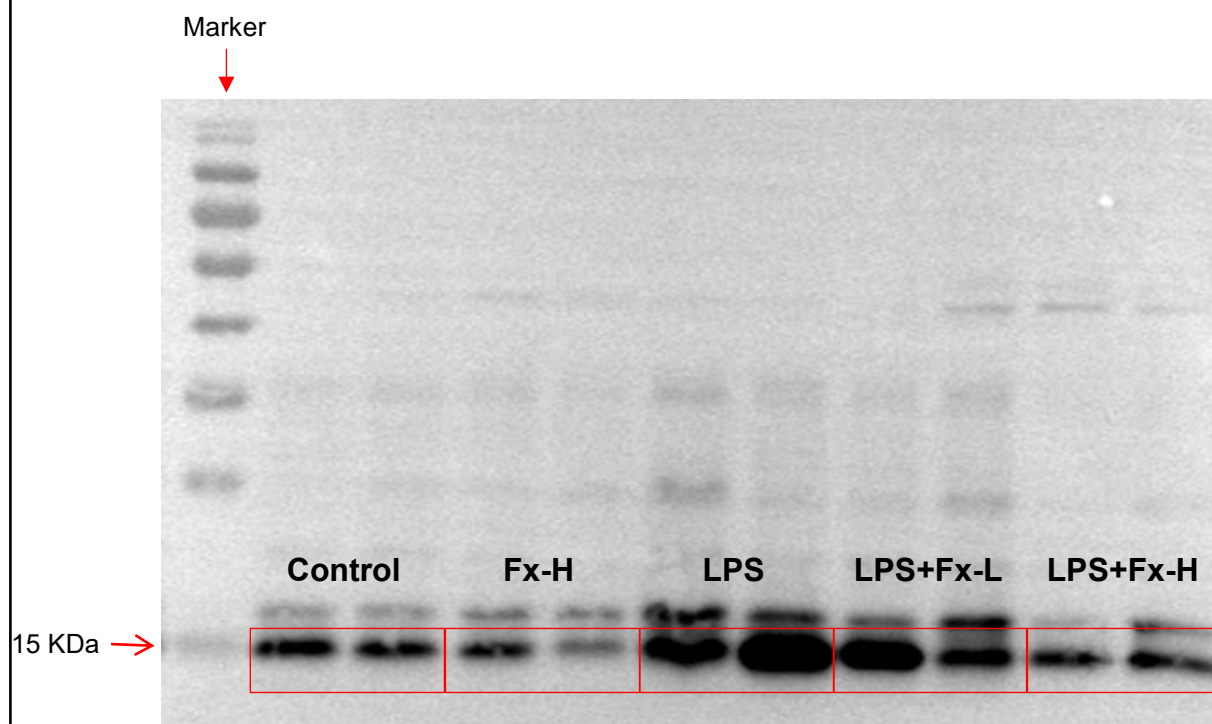

### Ileal GAPDH

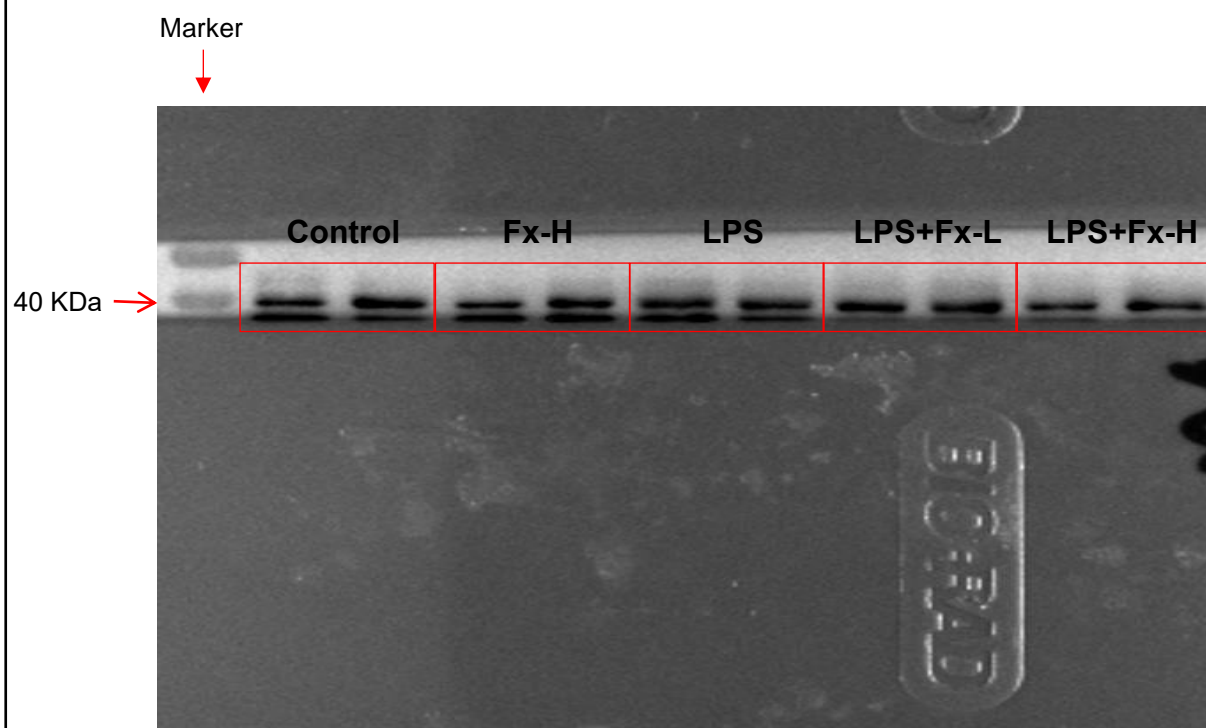

Uncropped blots for **Figure 2J**

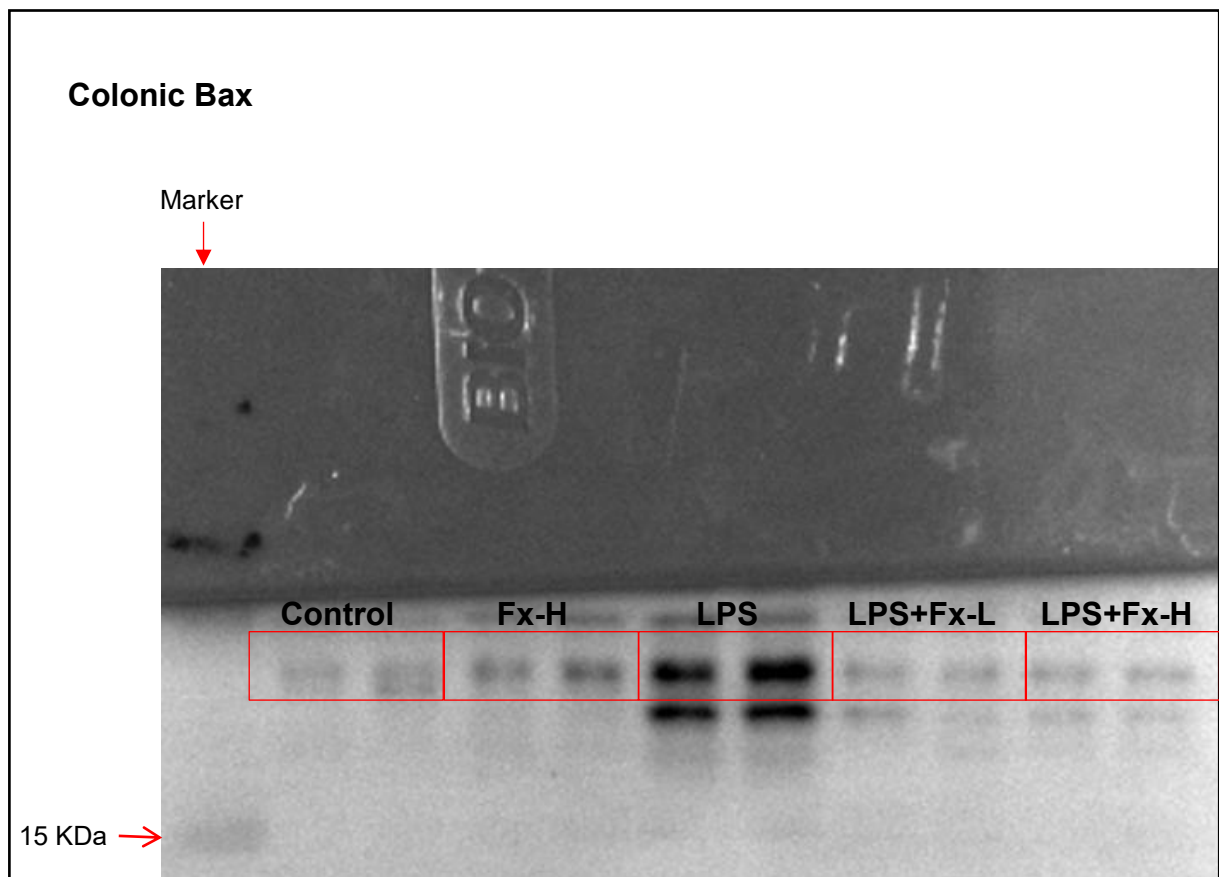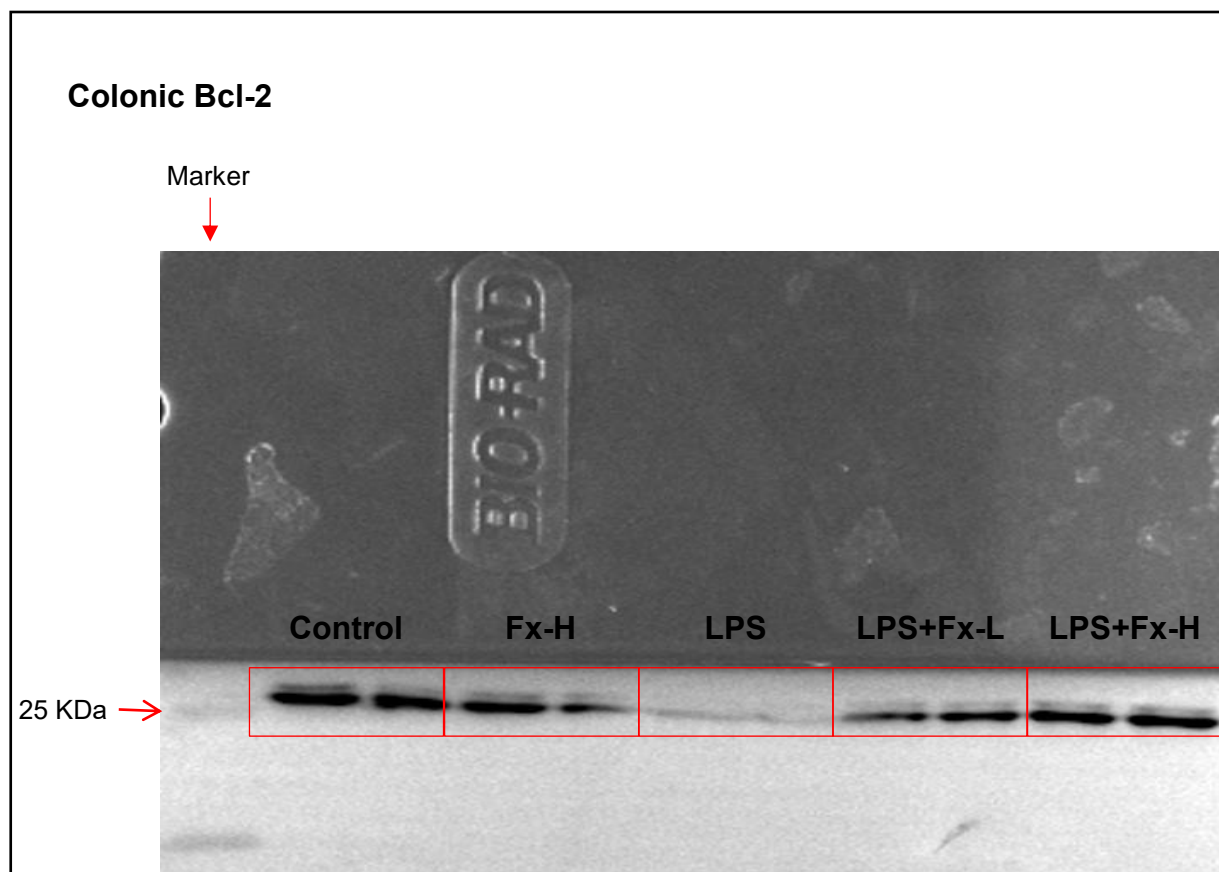

### Colonic cleaved caspase-3

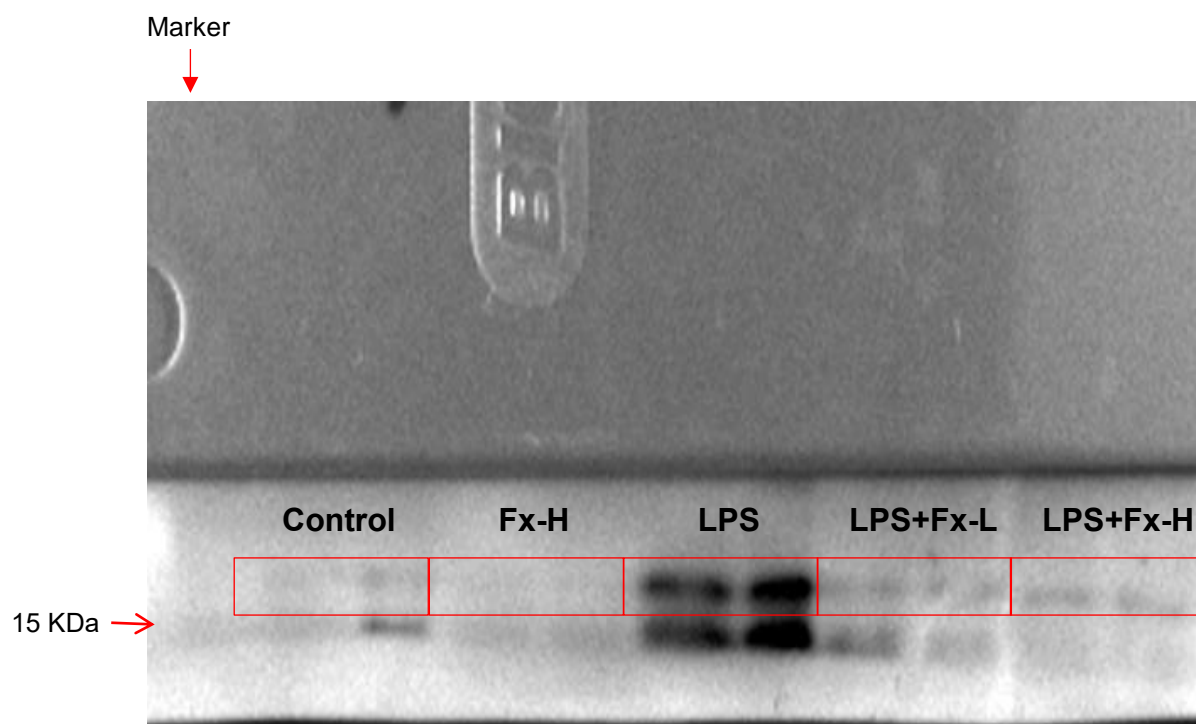

### Colonic GAPDH

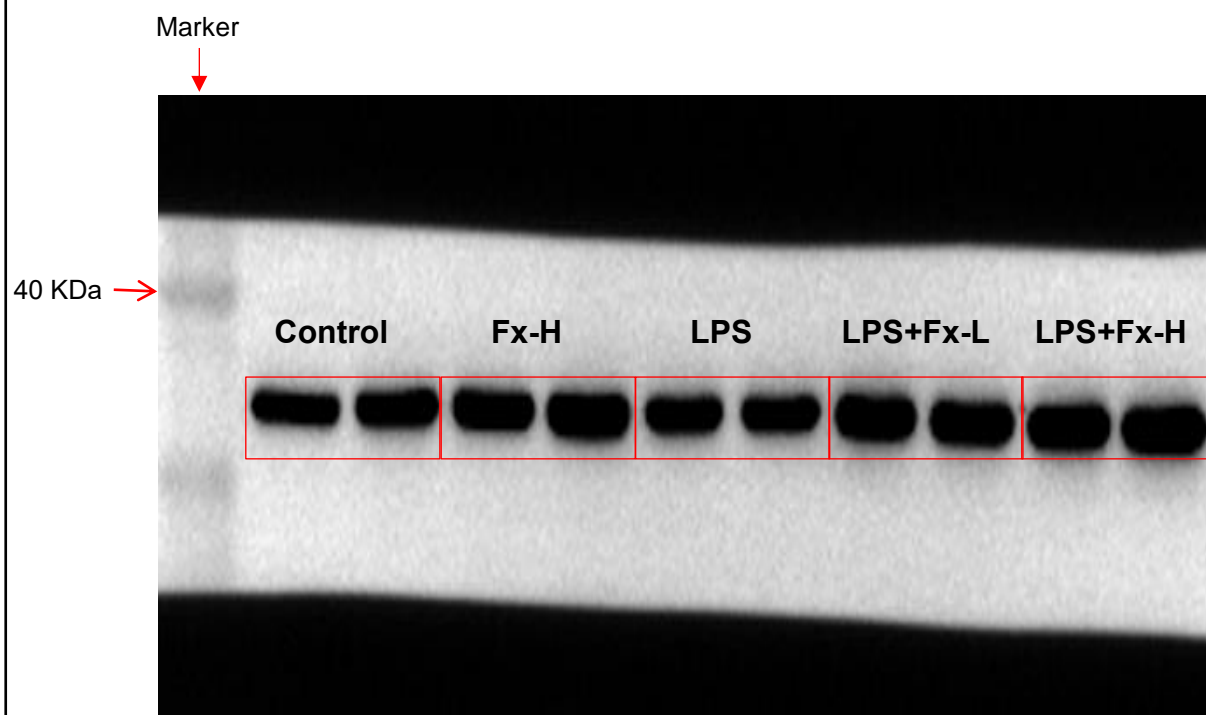

Uncropped blots for **Figure 3A**

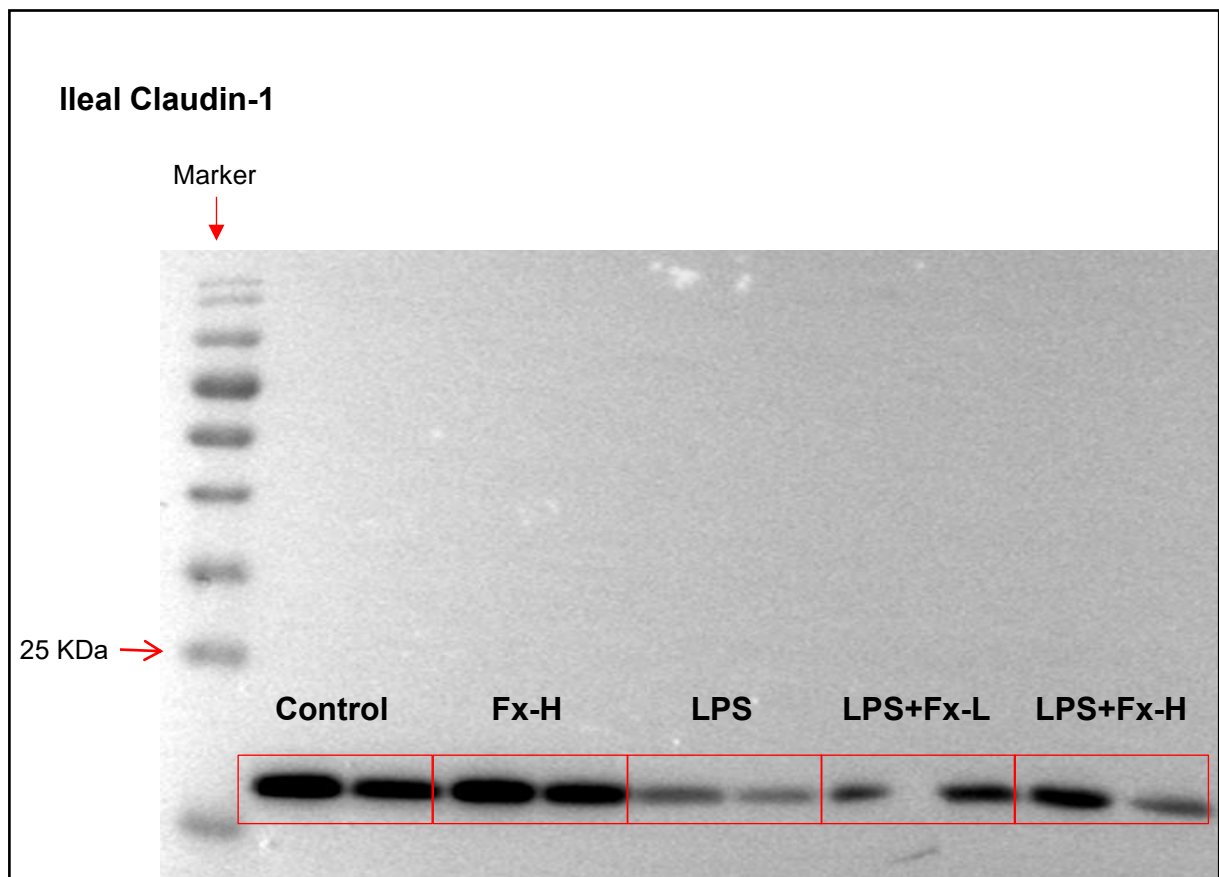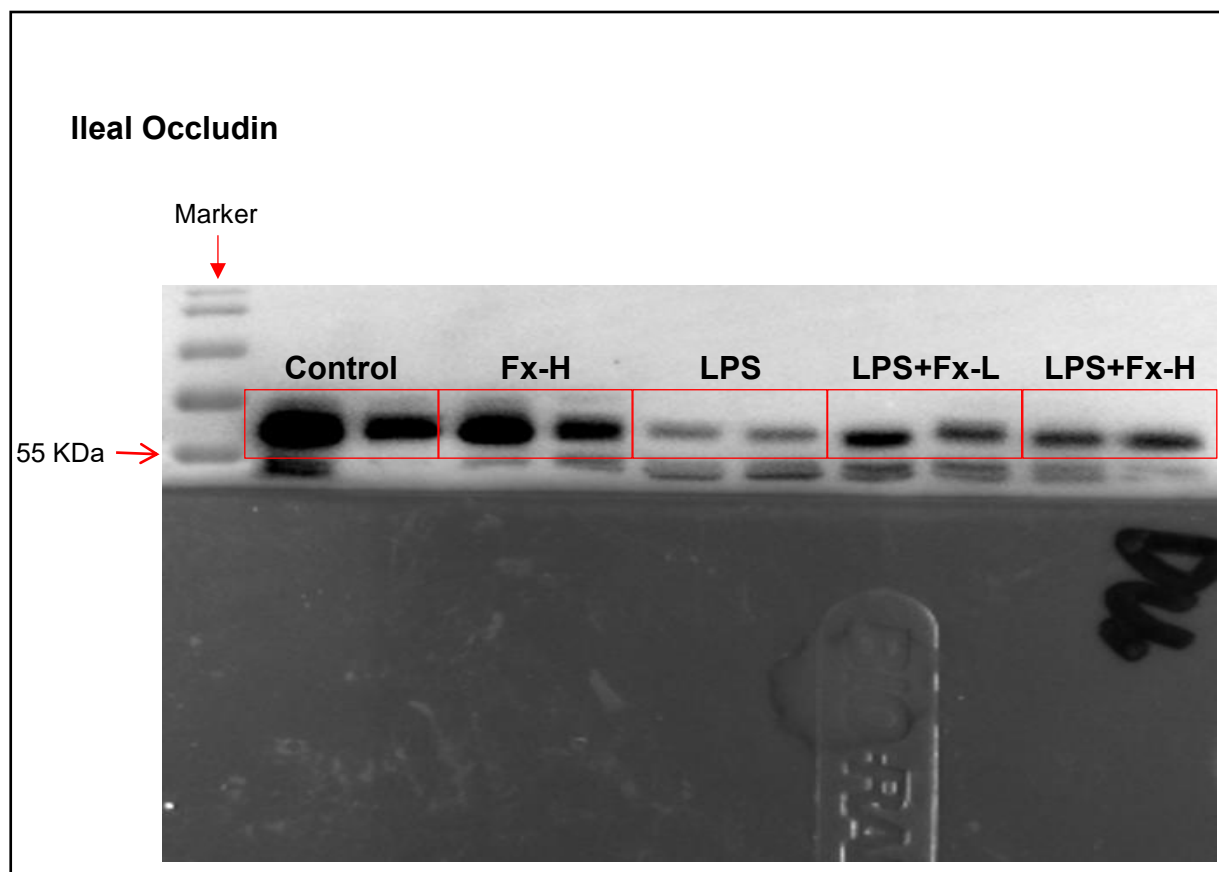



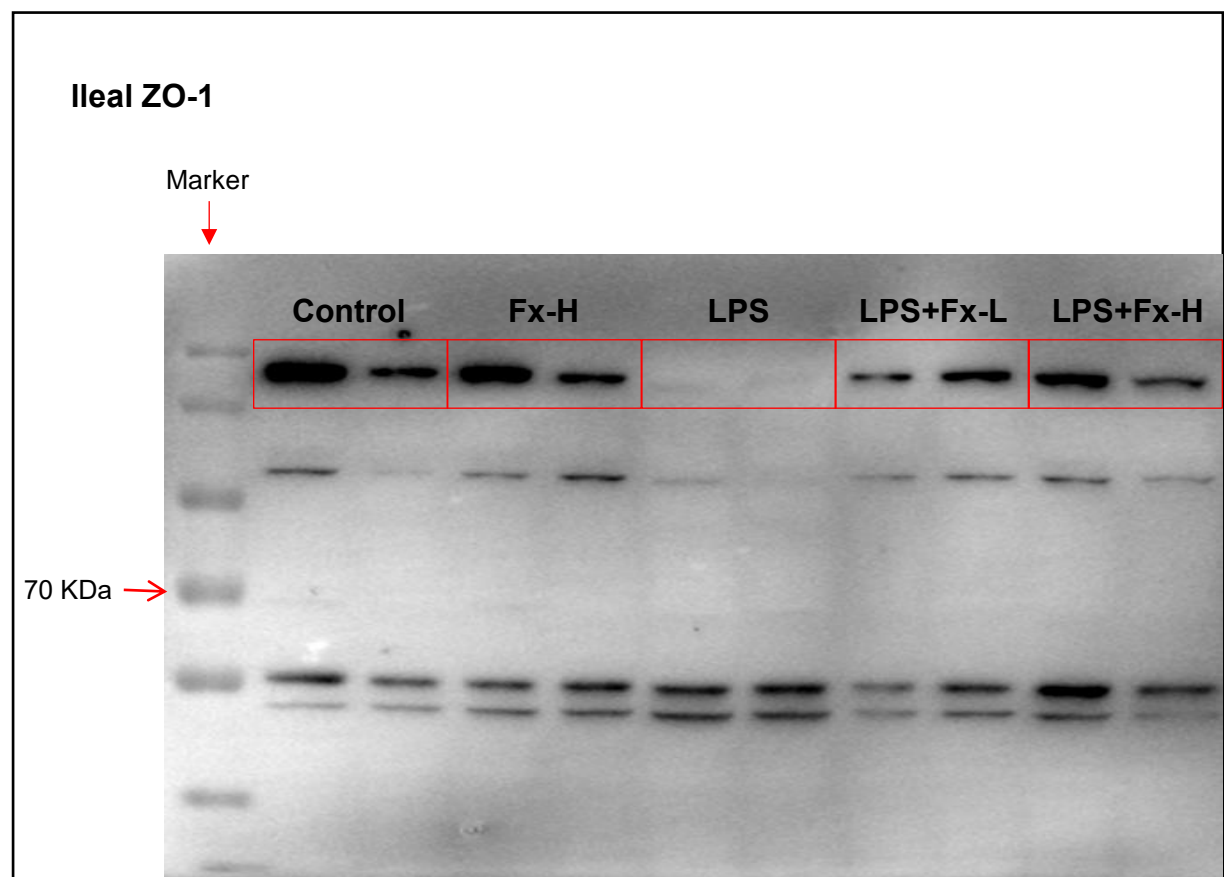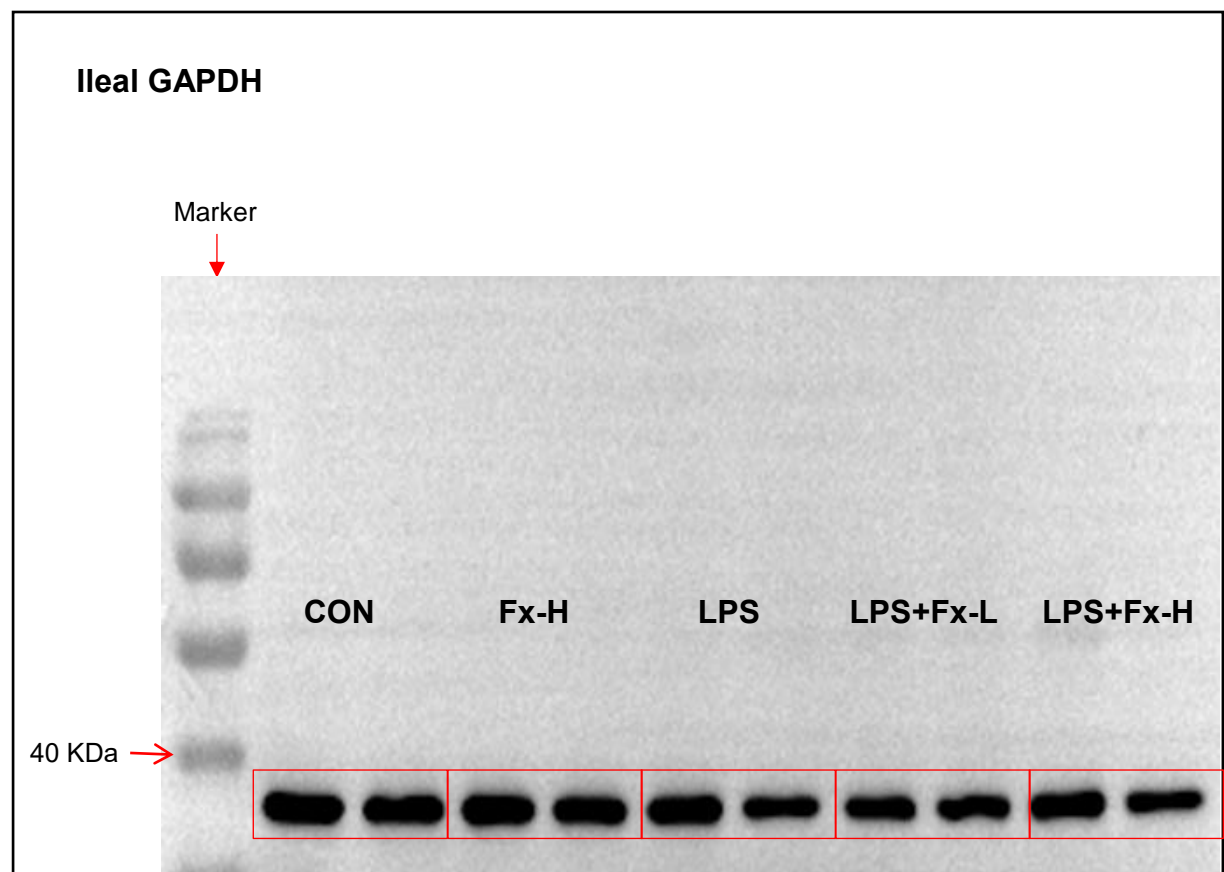

Uncropped blots for **Figure 3E**

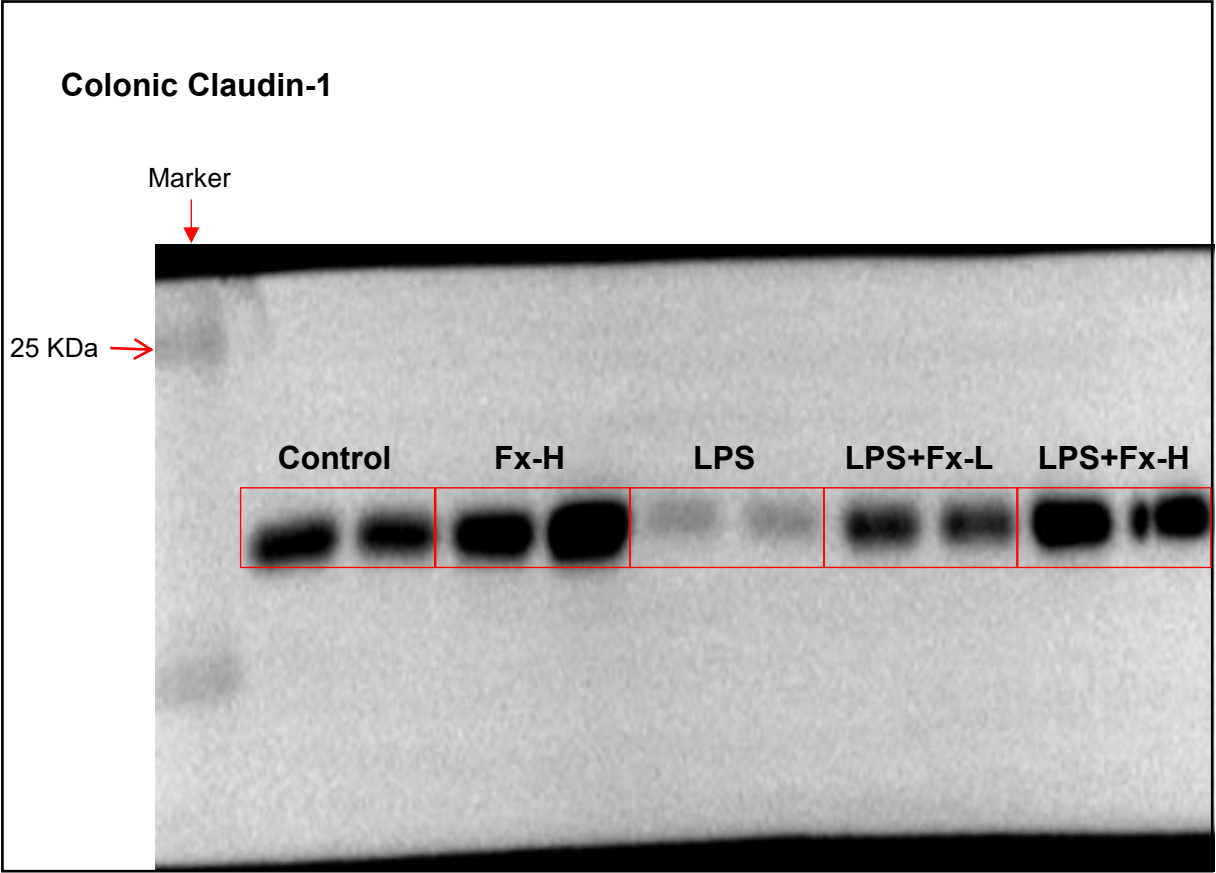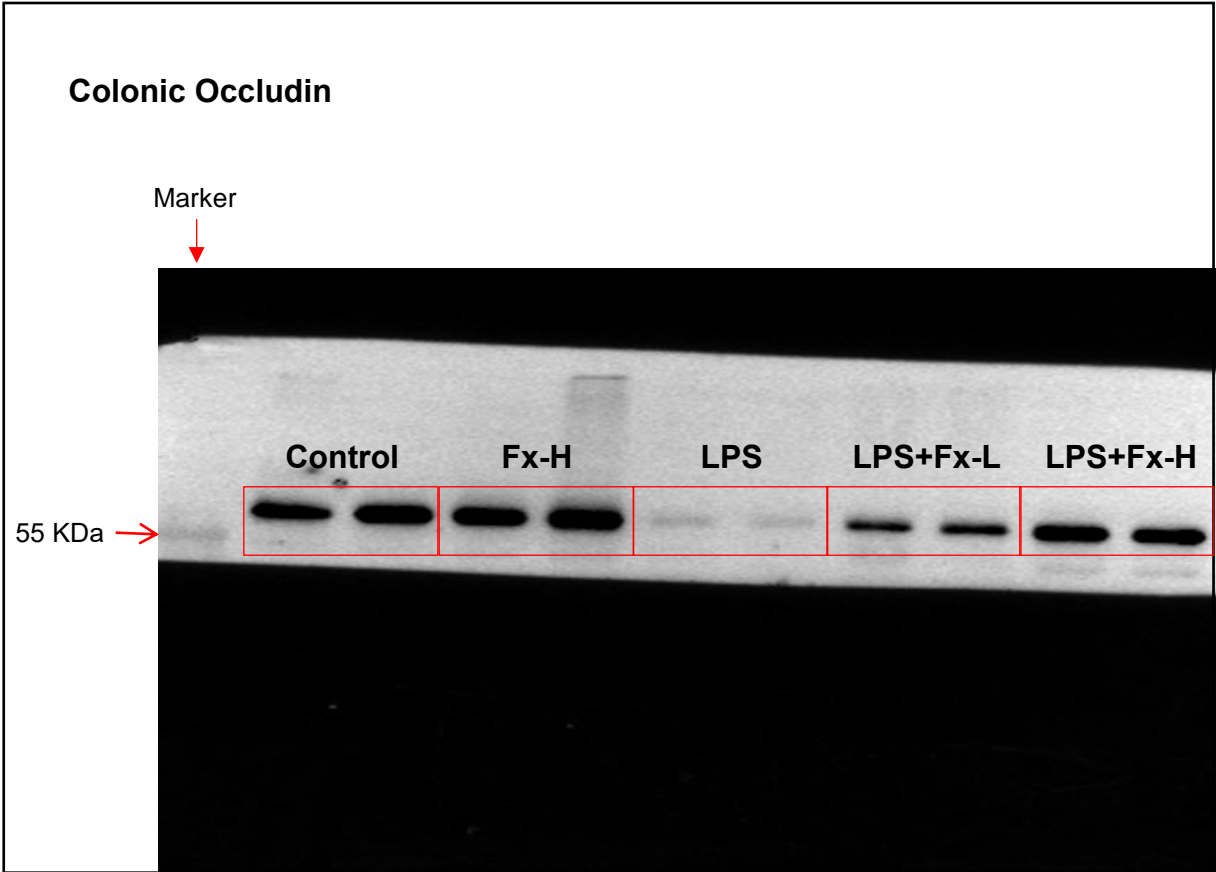

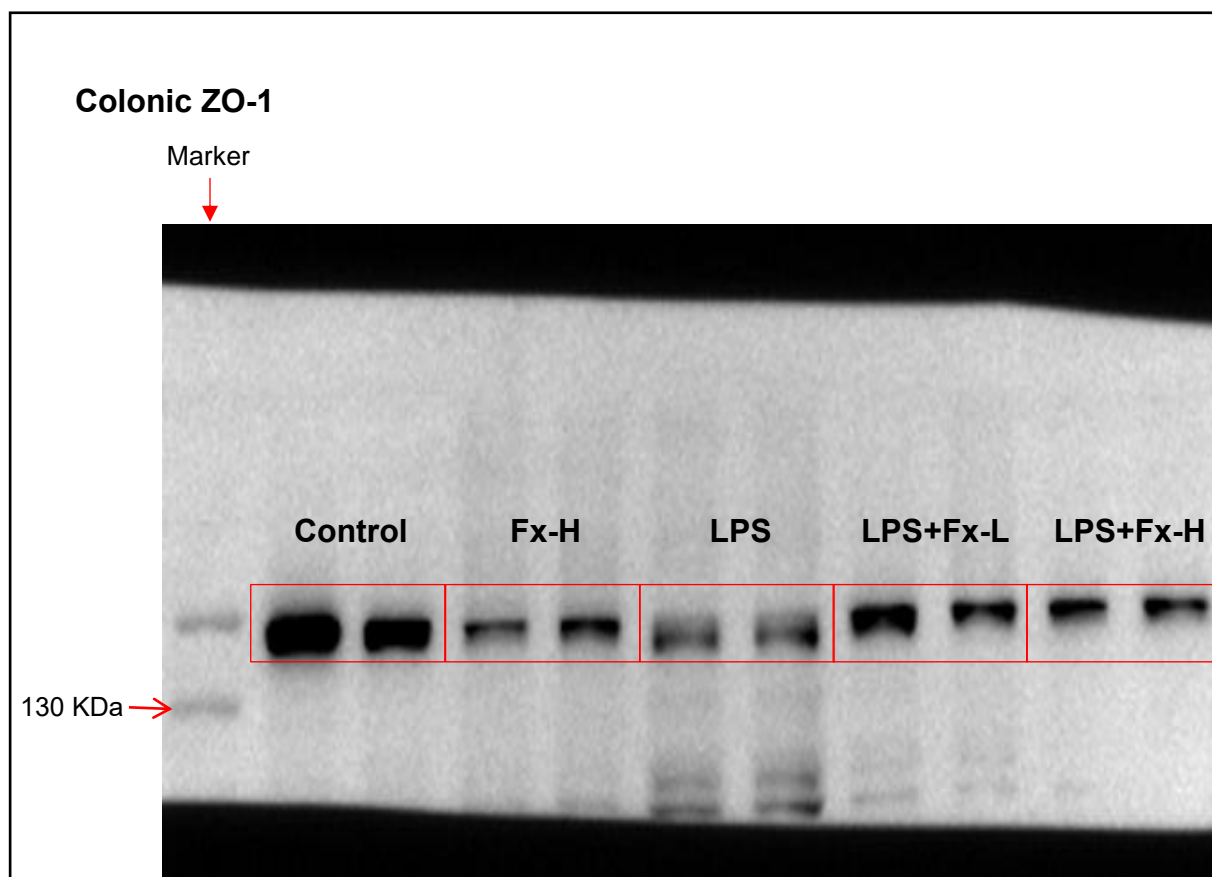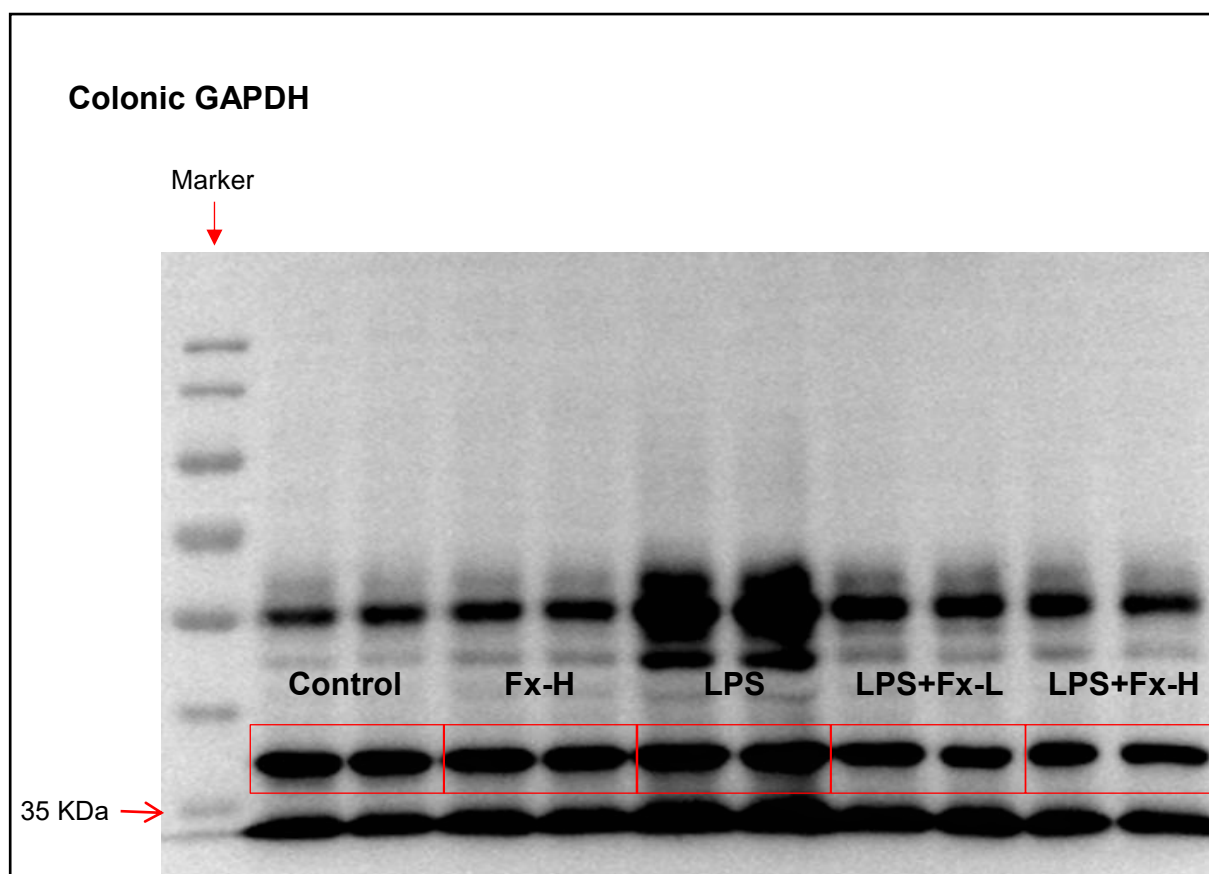

Uncropped blots for **Figure 4F**

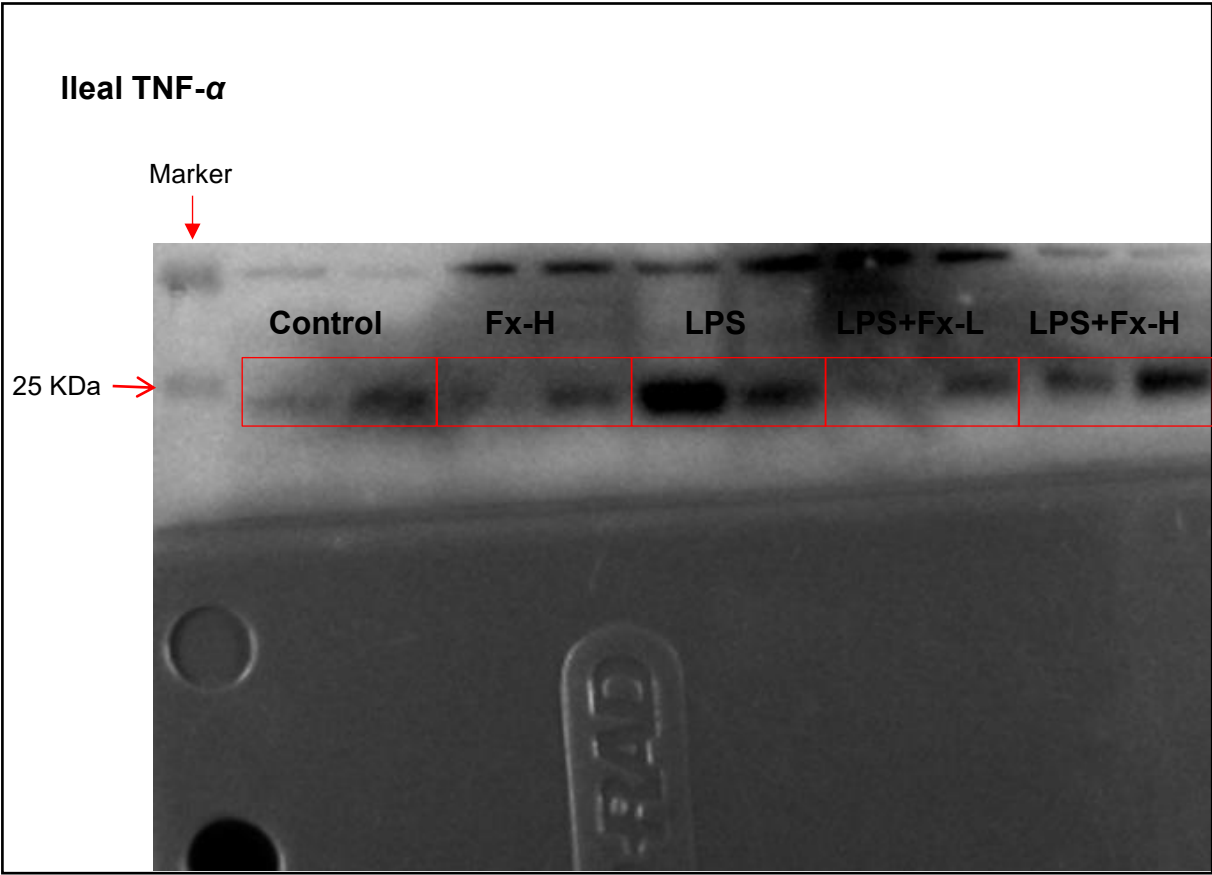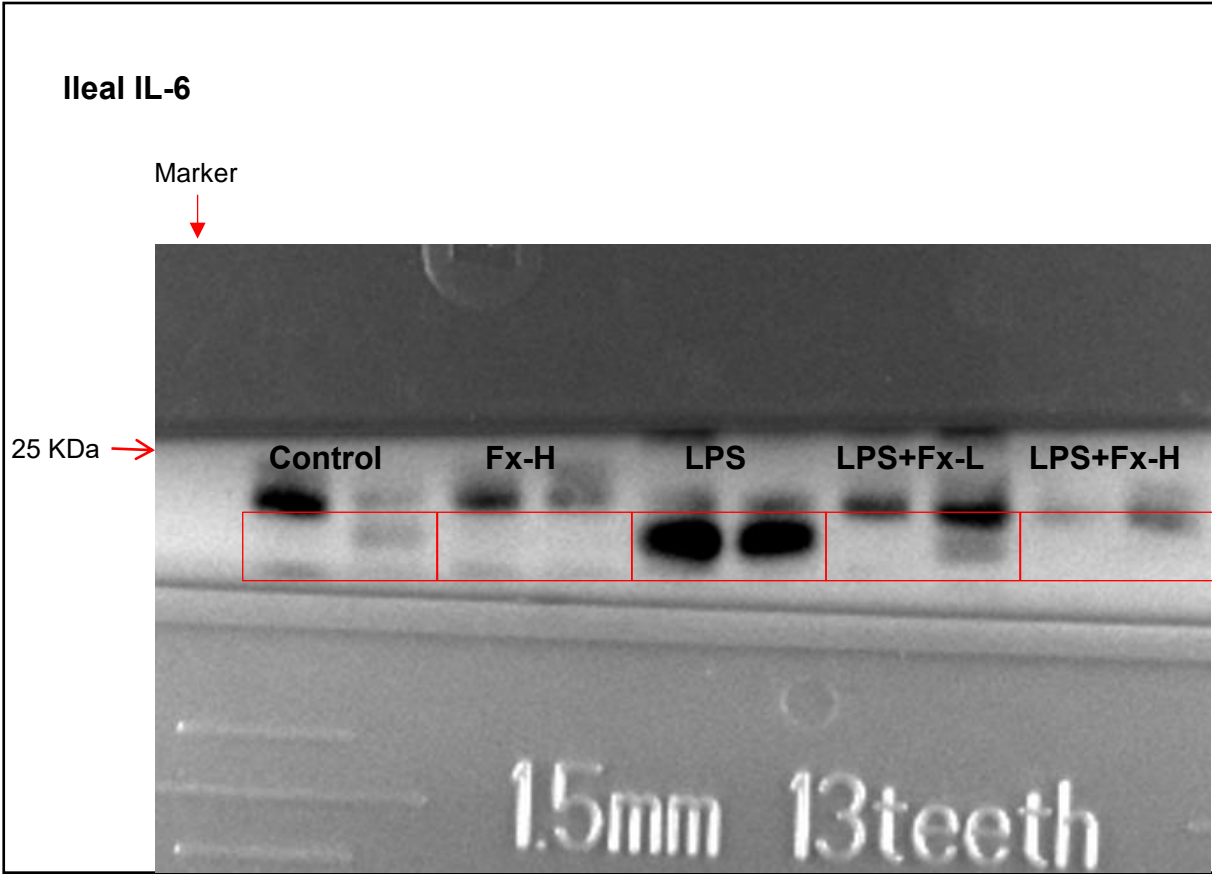

# Ileal GAPDH

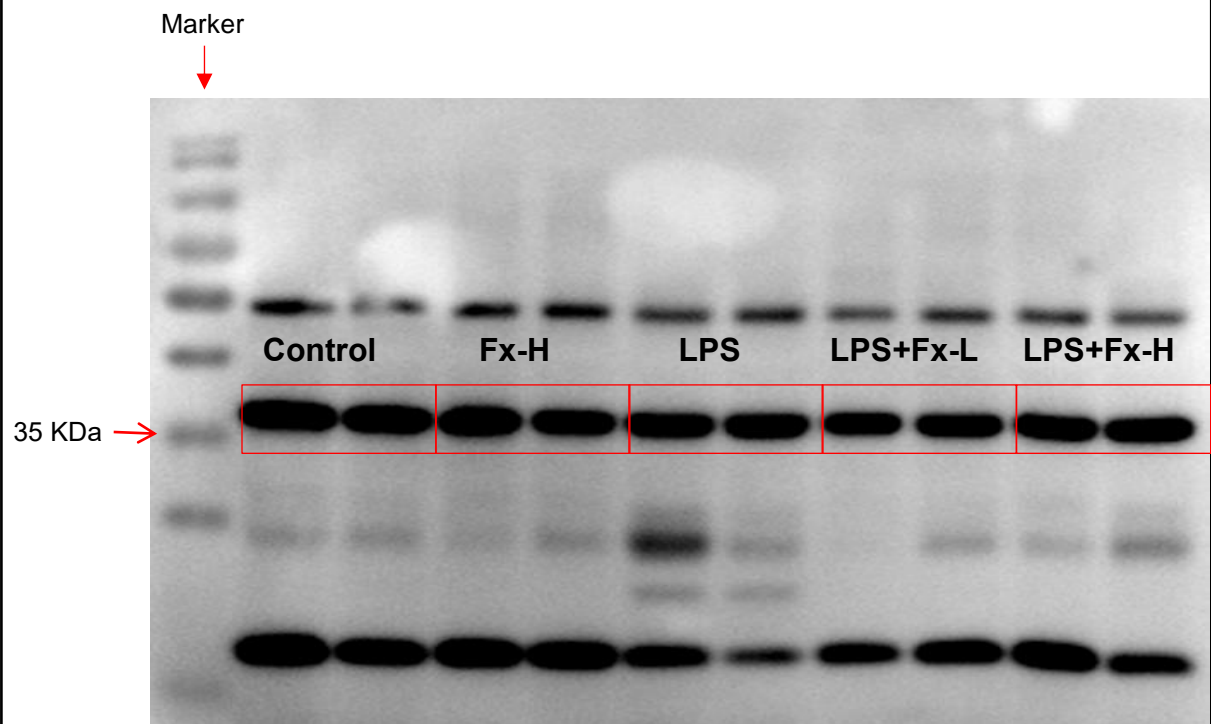

Uncropped blots for **Figure 4I**

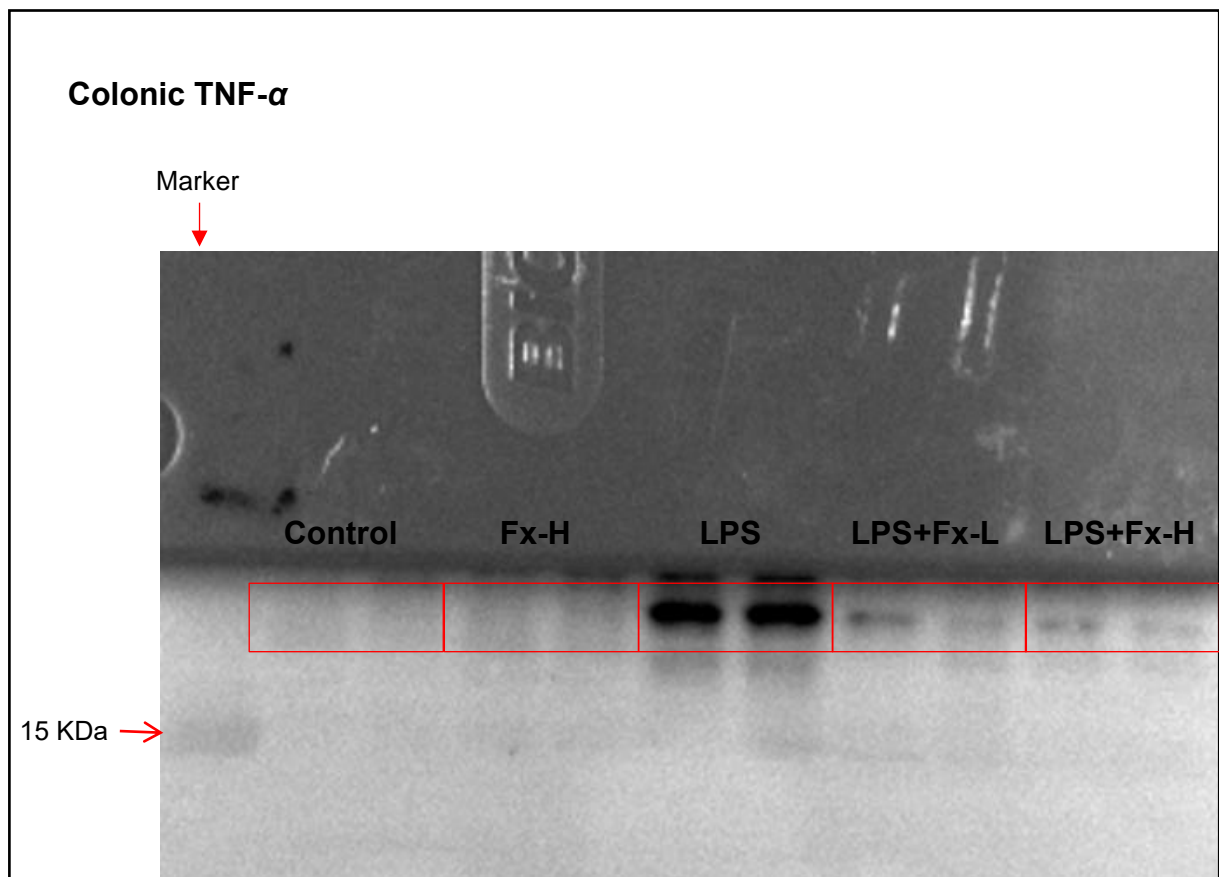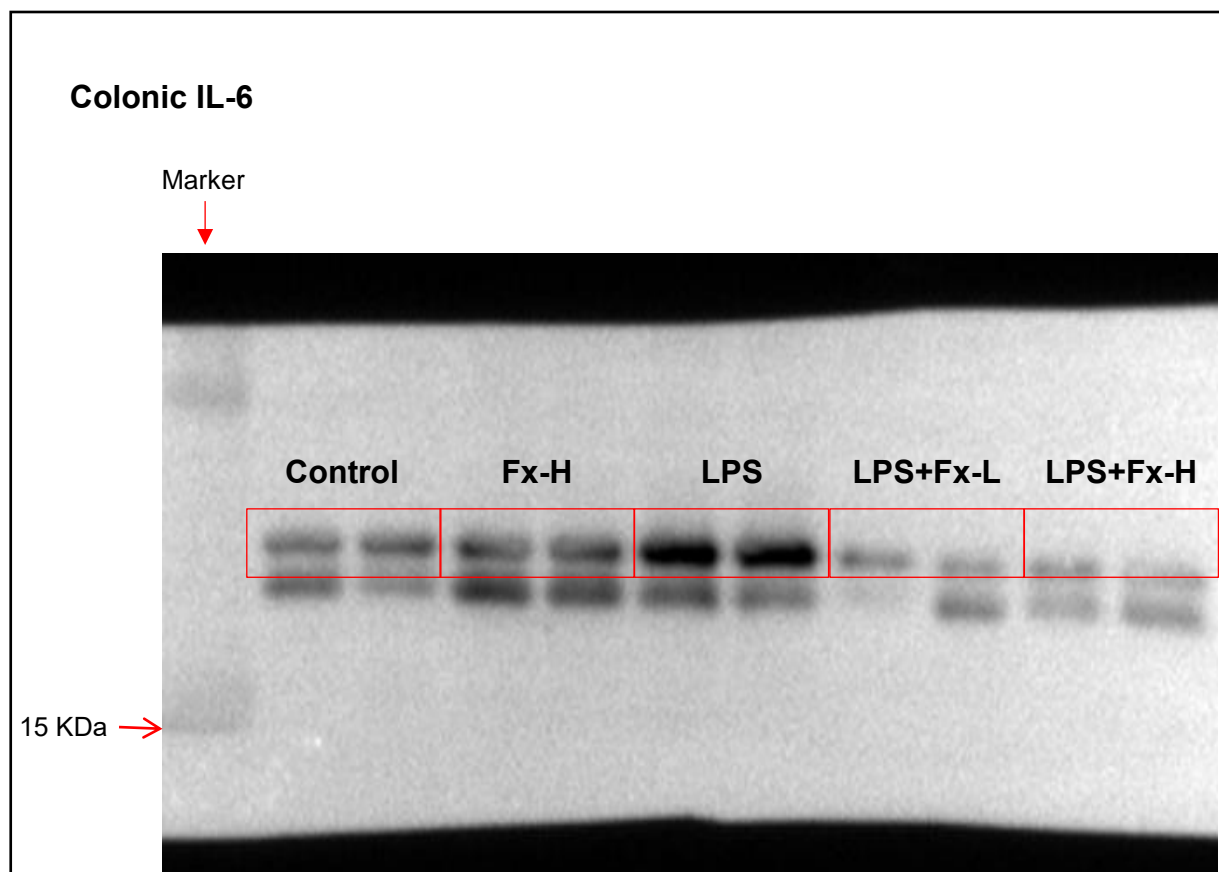

## Colonic GAPDH

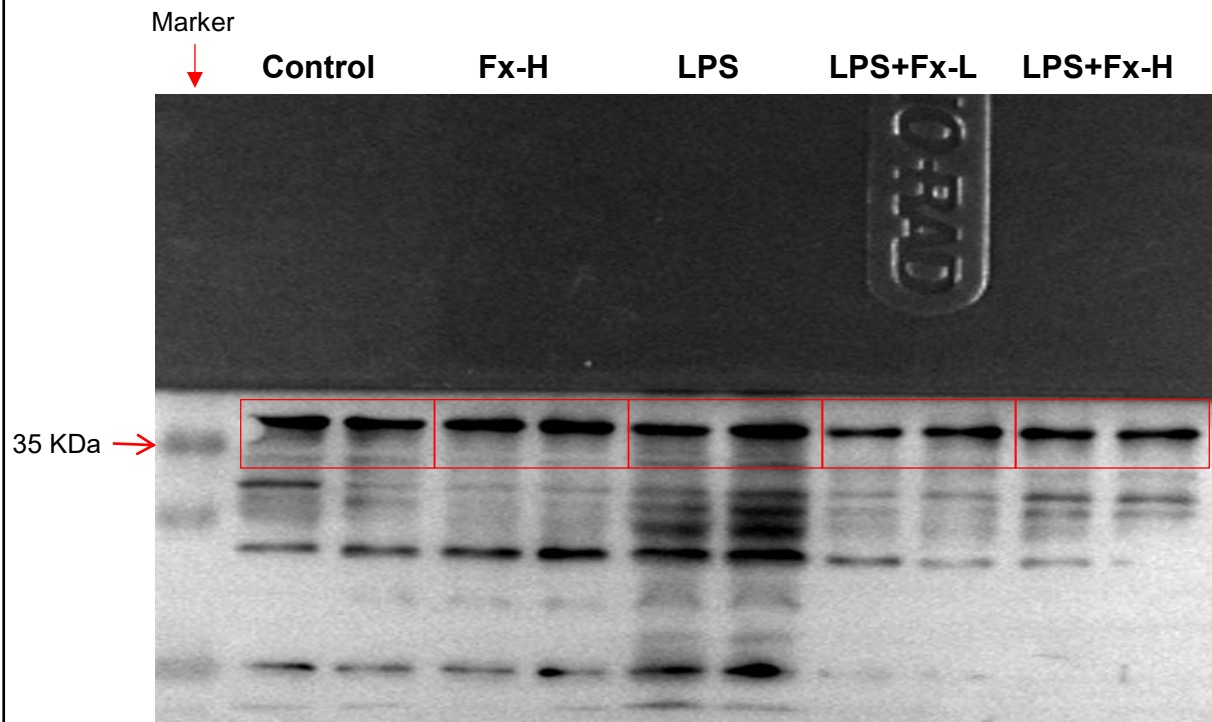



Uncropped blots for **Figure 5A**

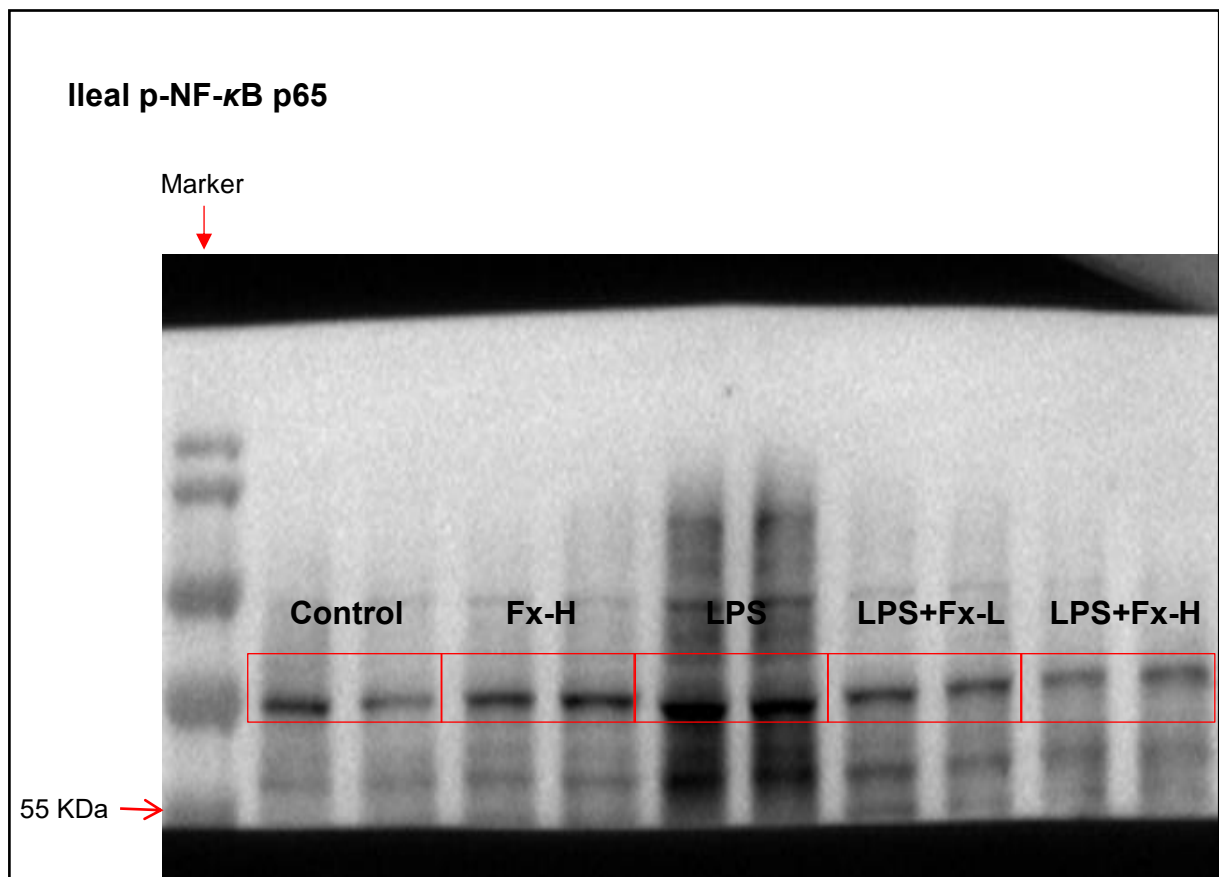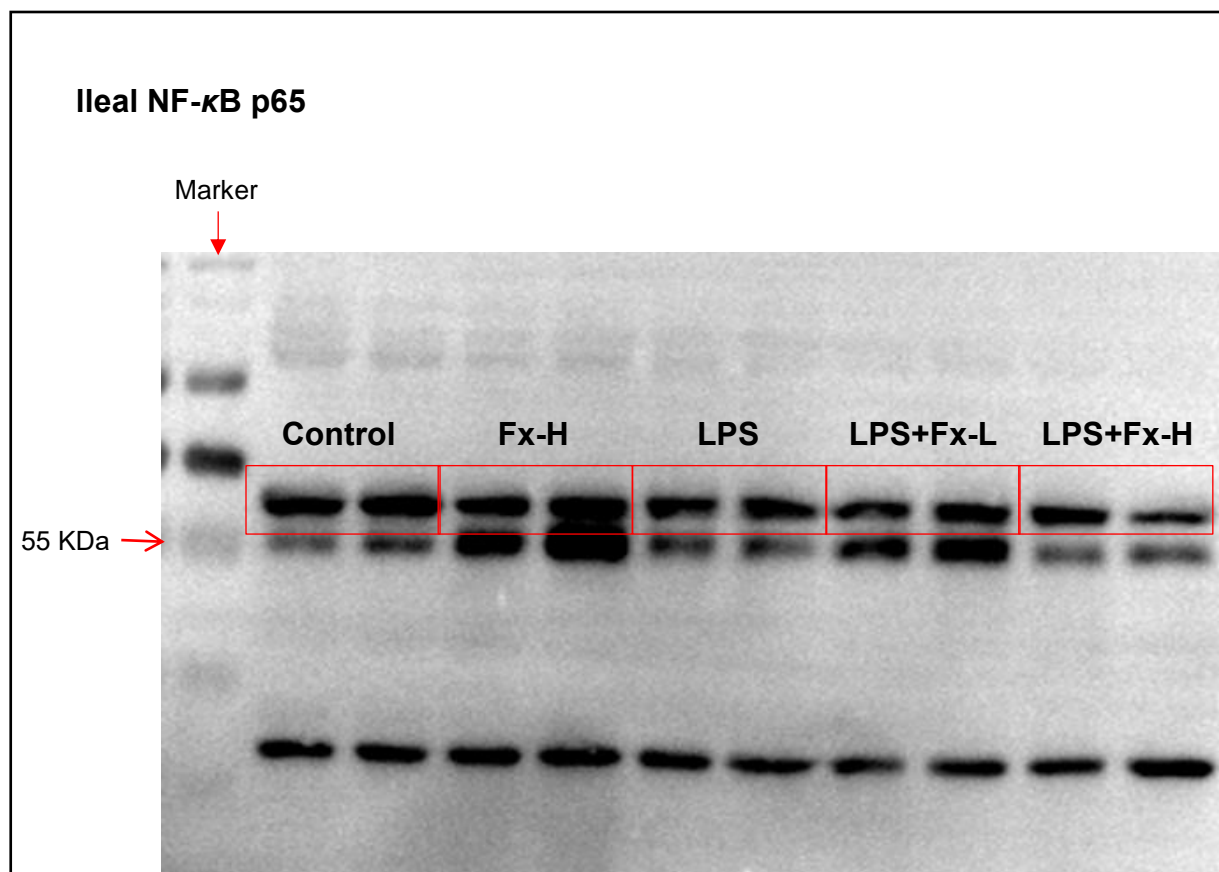



### Ileal p-ERK 1/2

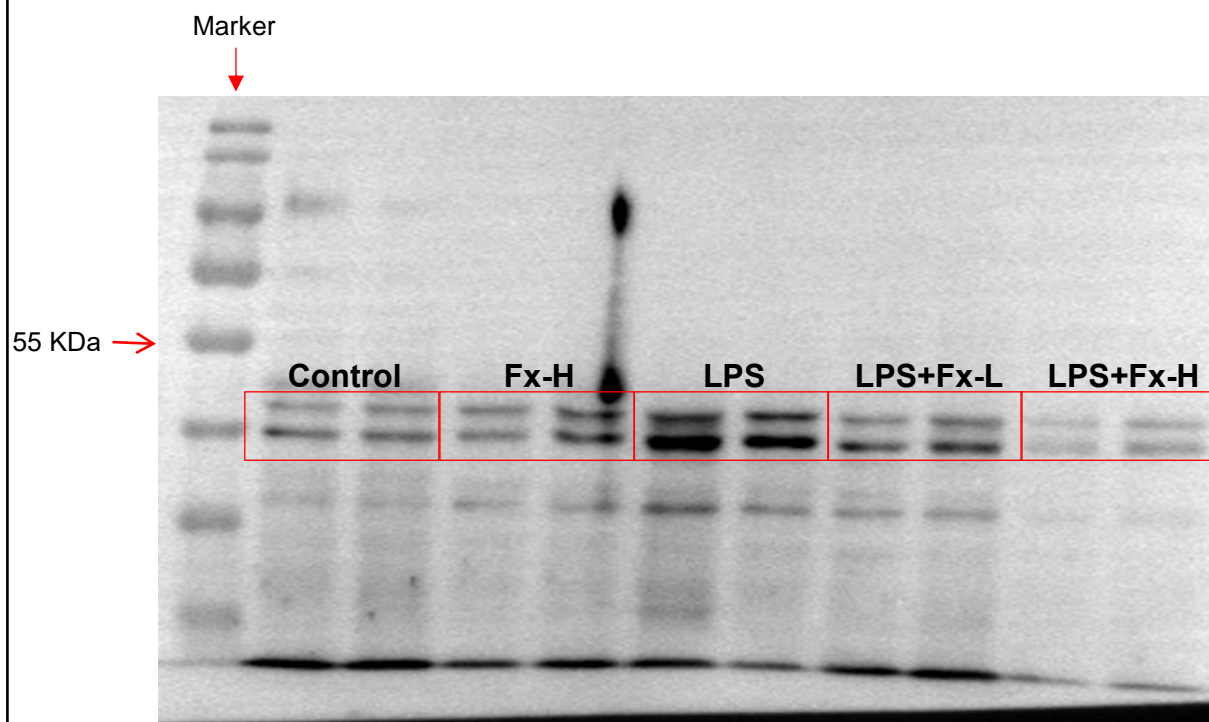

### Ileal ERK 1/2

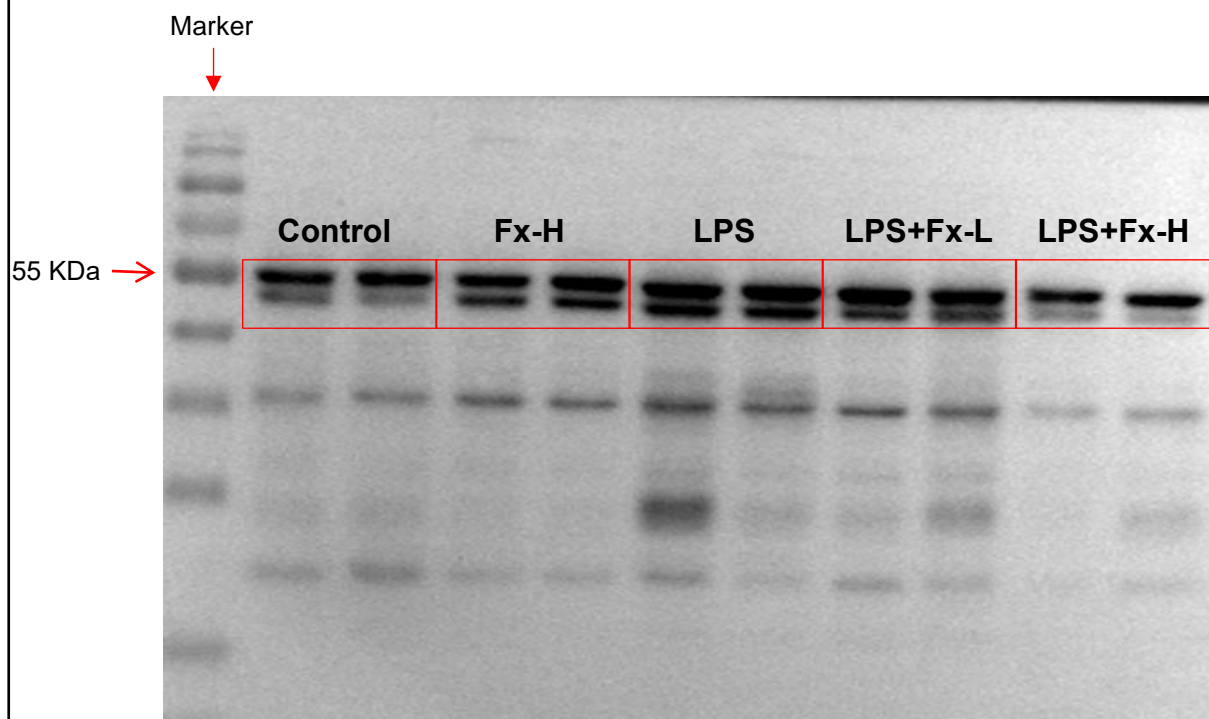

### Ileal p-JNK

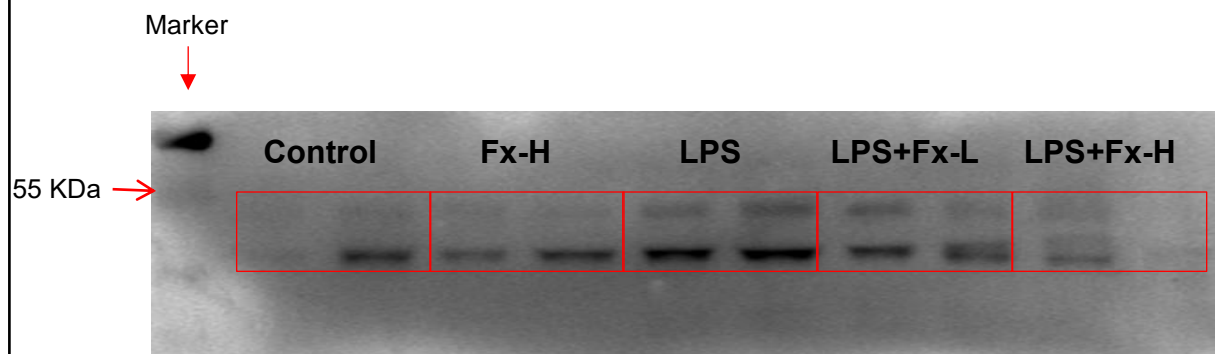

### Ileal JNK

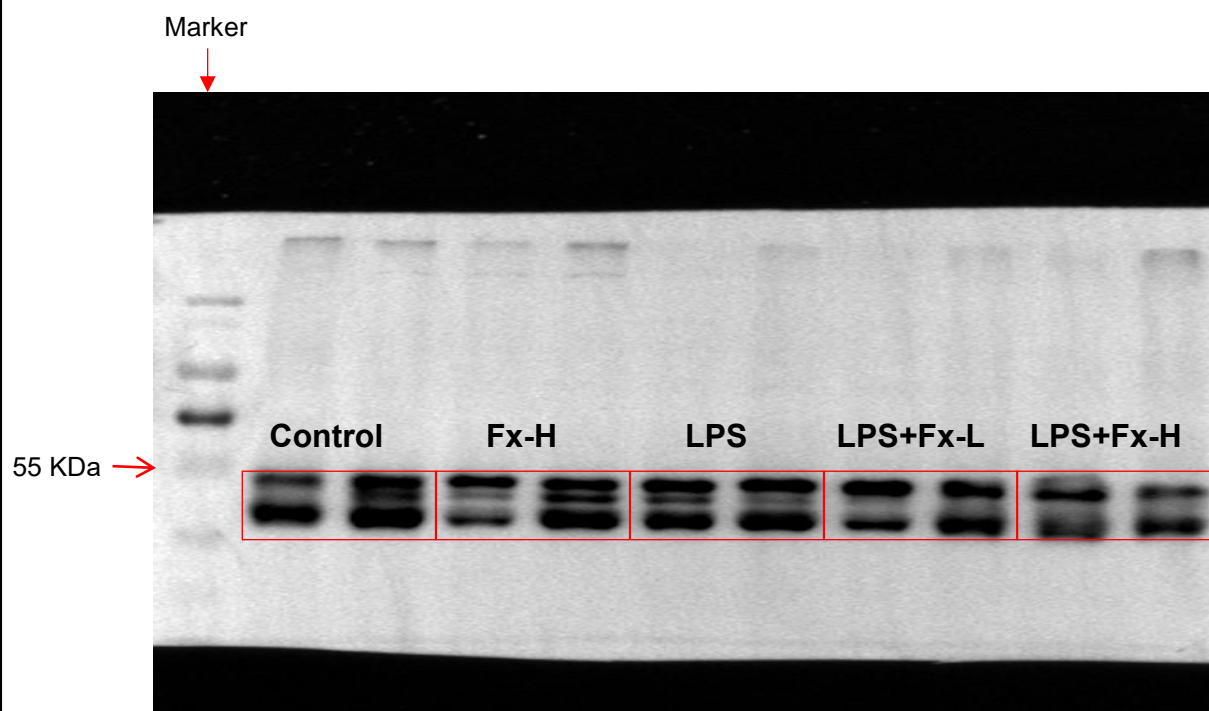

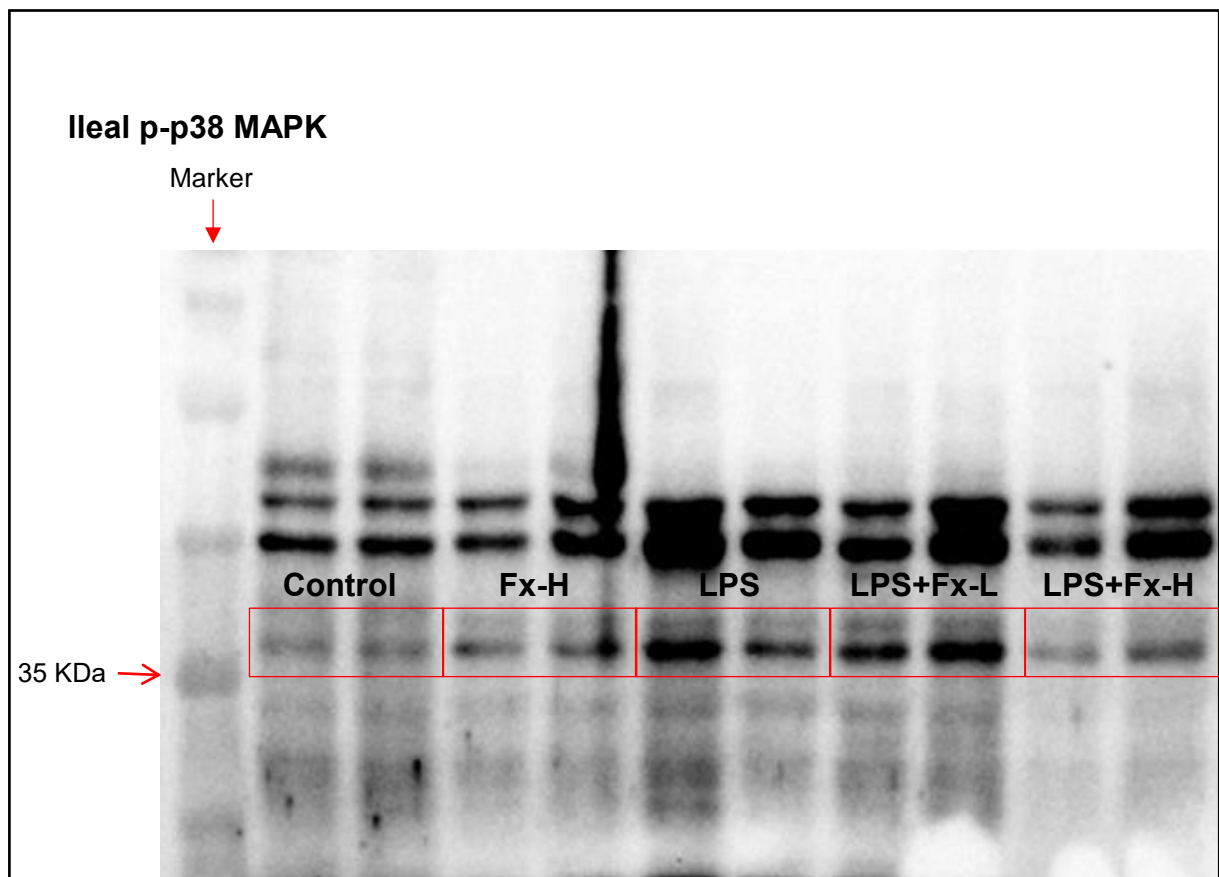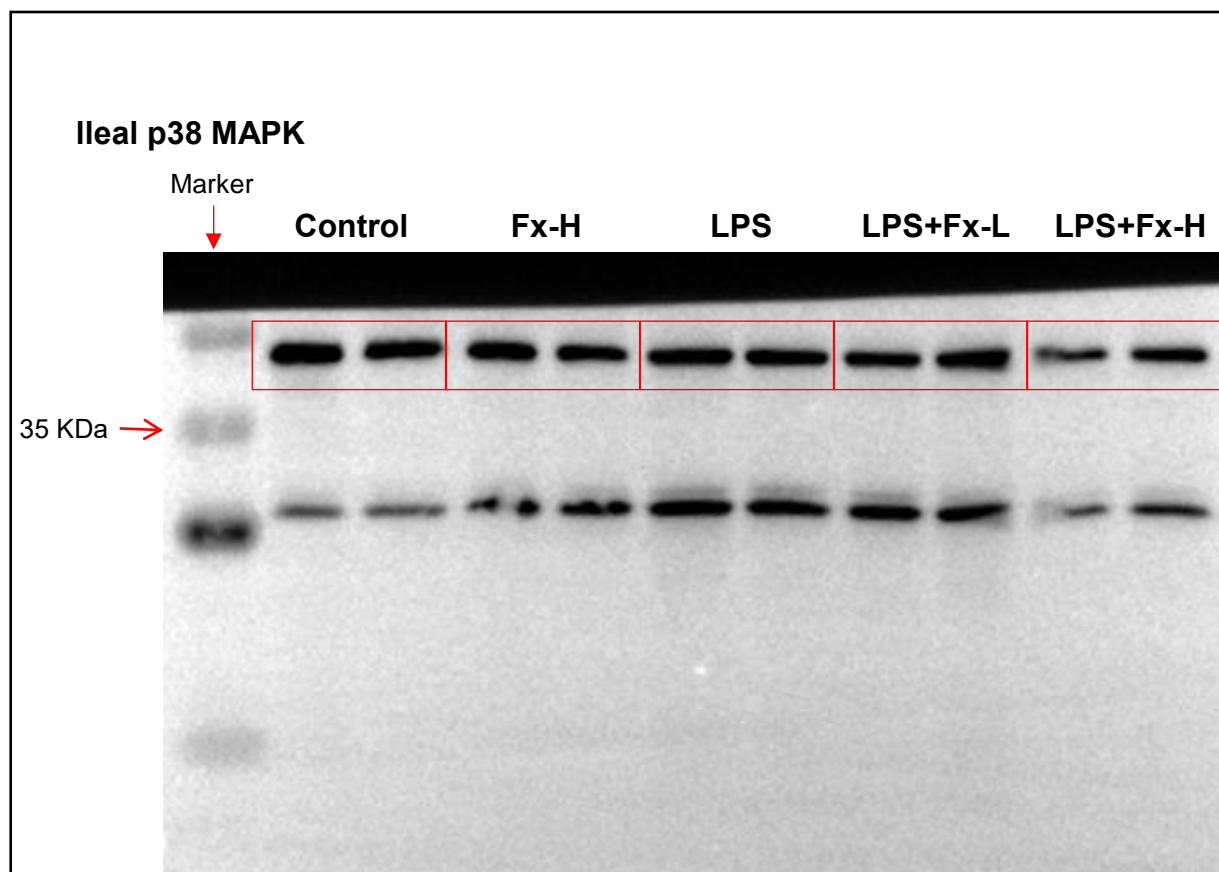

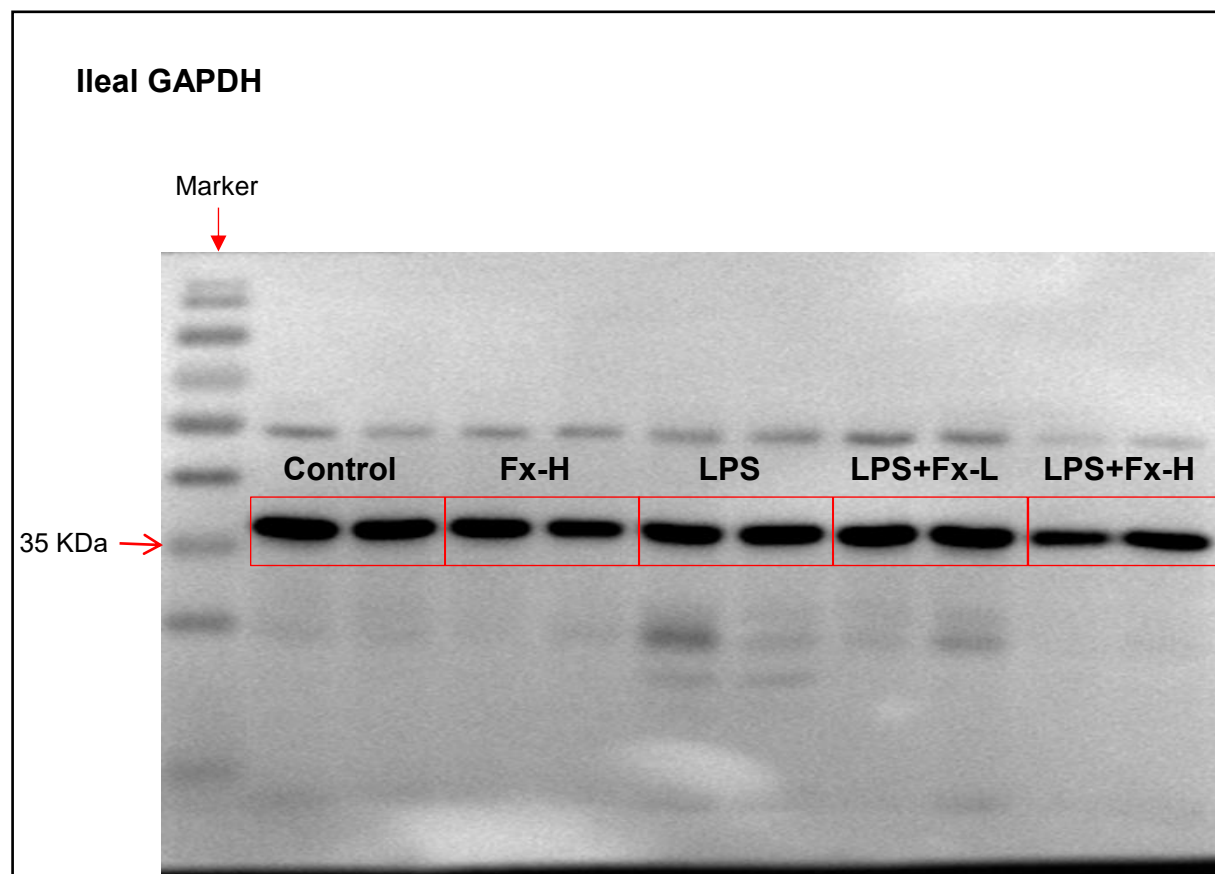

Uncropped blots for **Figure 5F**

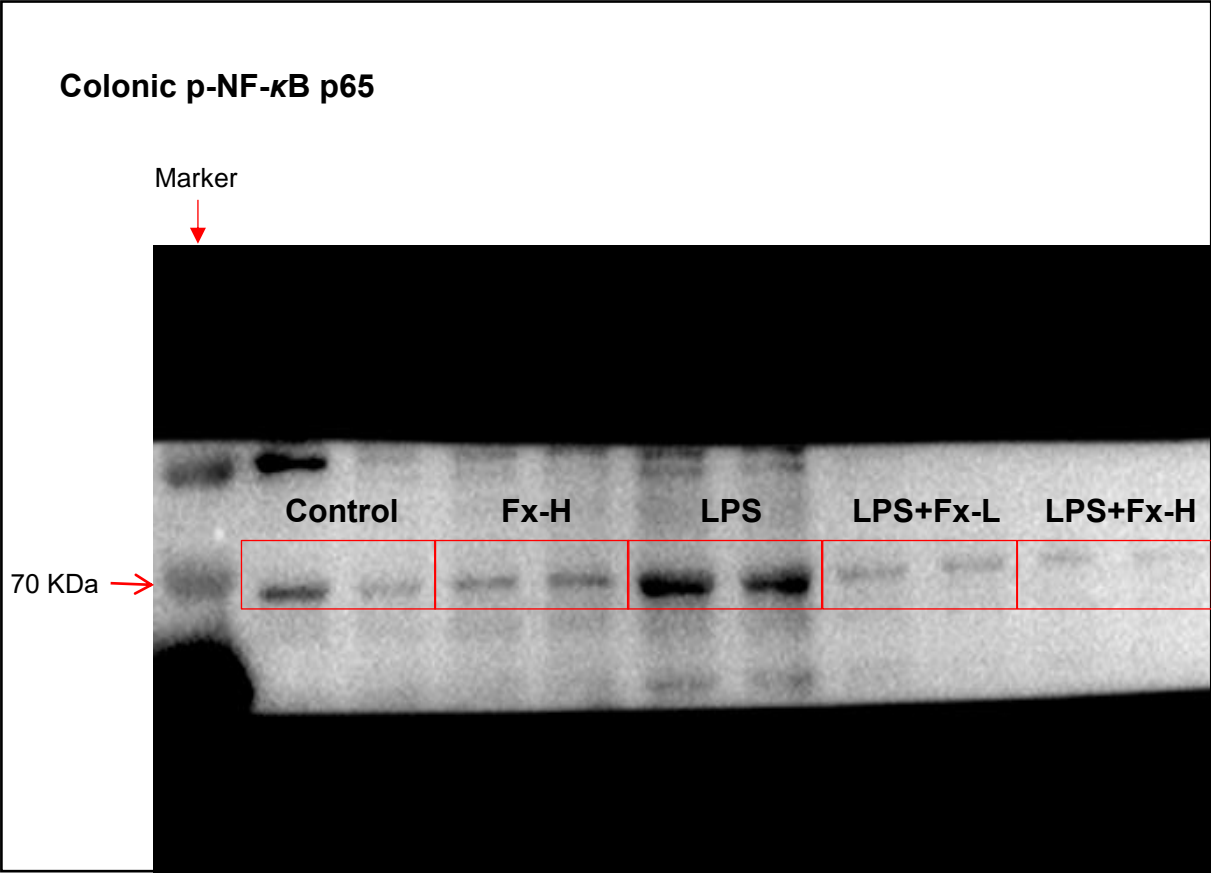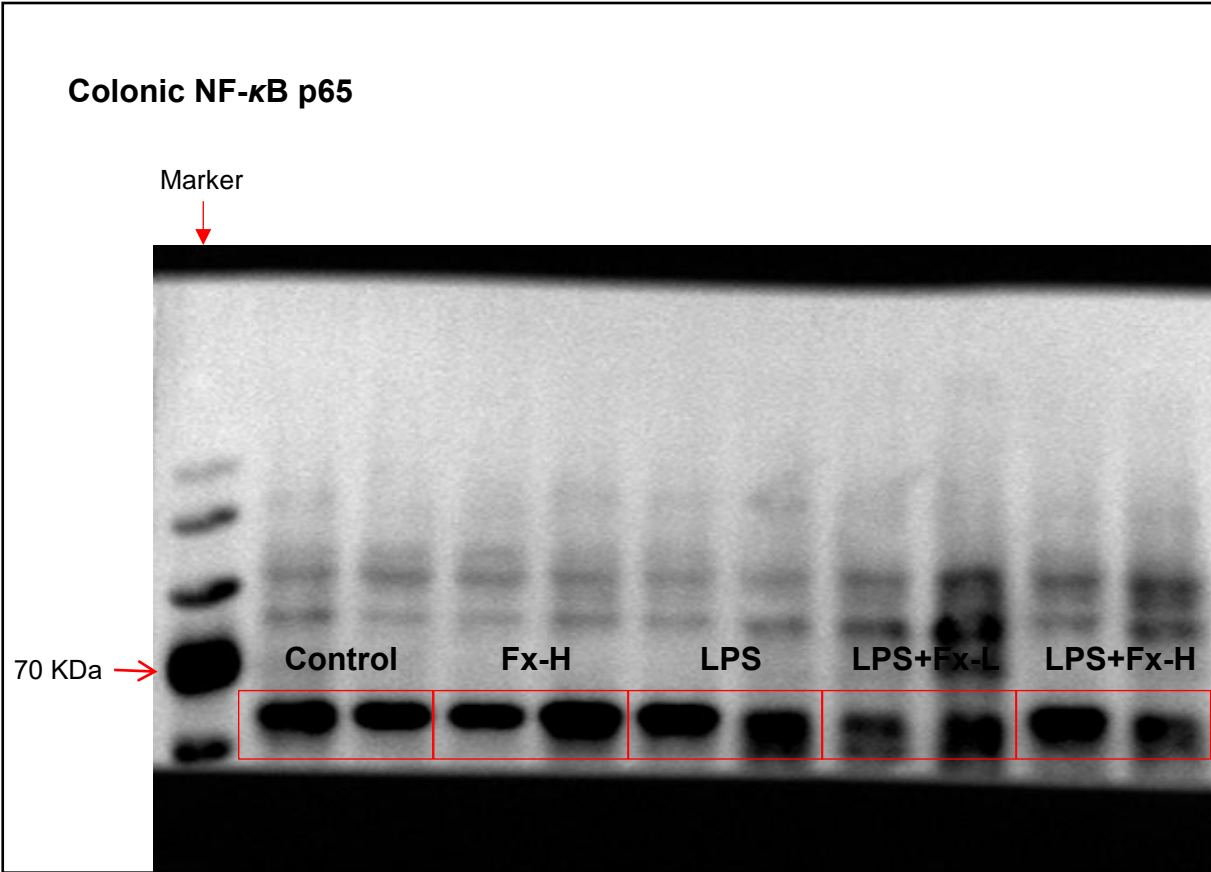

### Colonic p-ERK 1/2

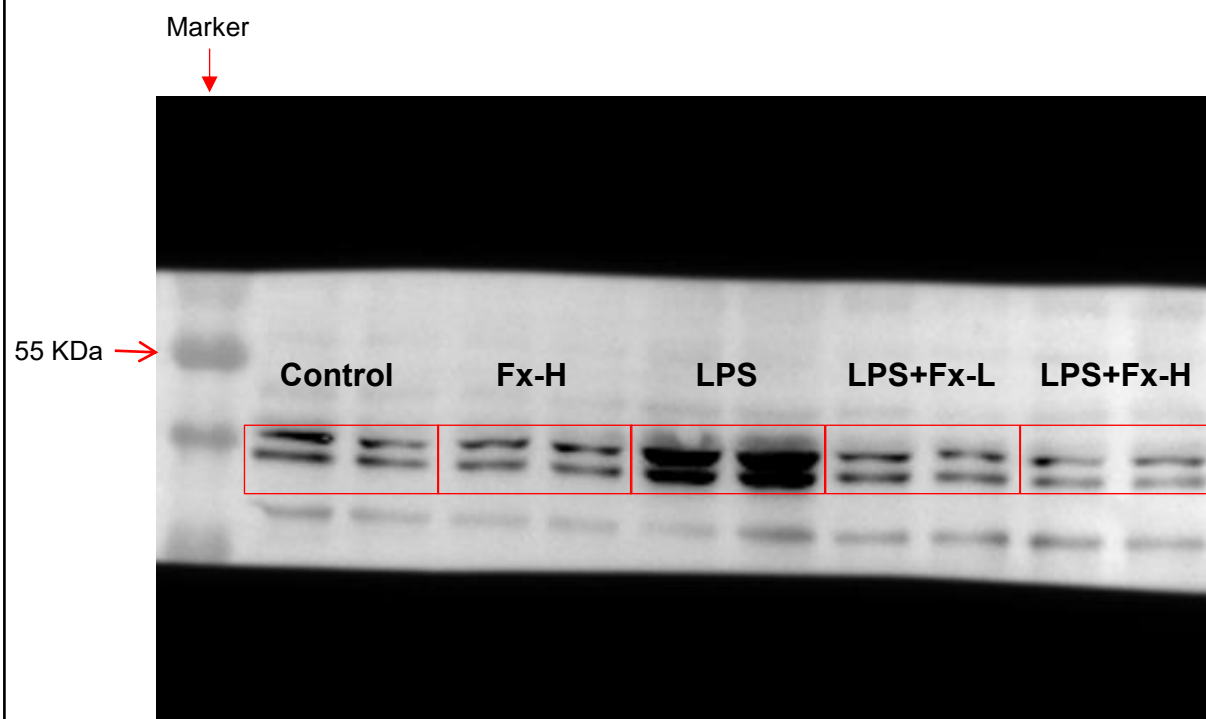

### Colonic ERK 1/2

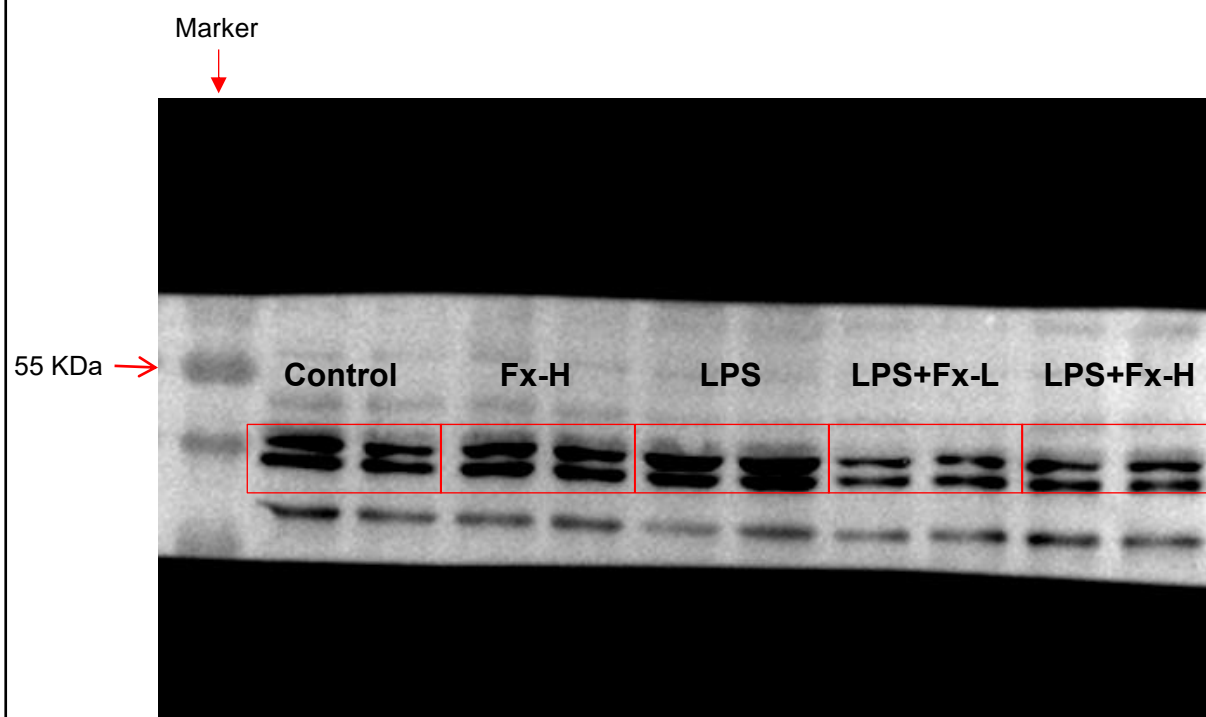

### Colonic p-JNK

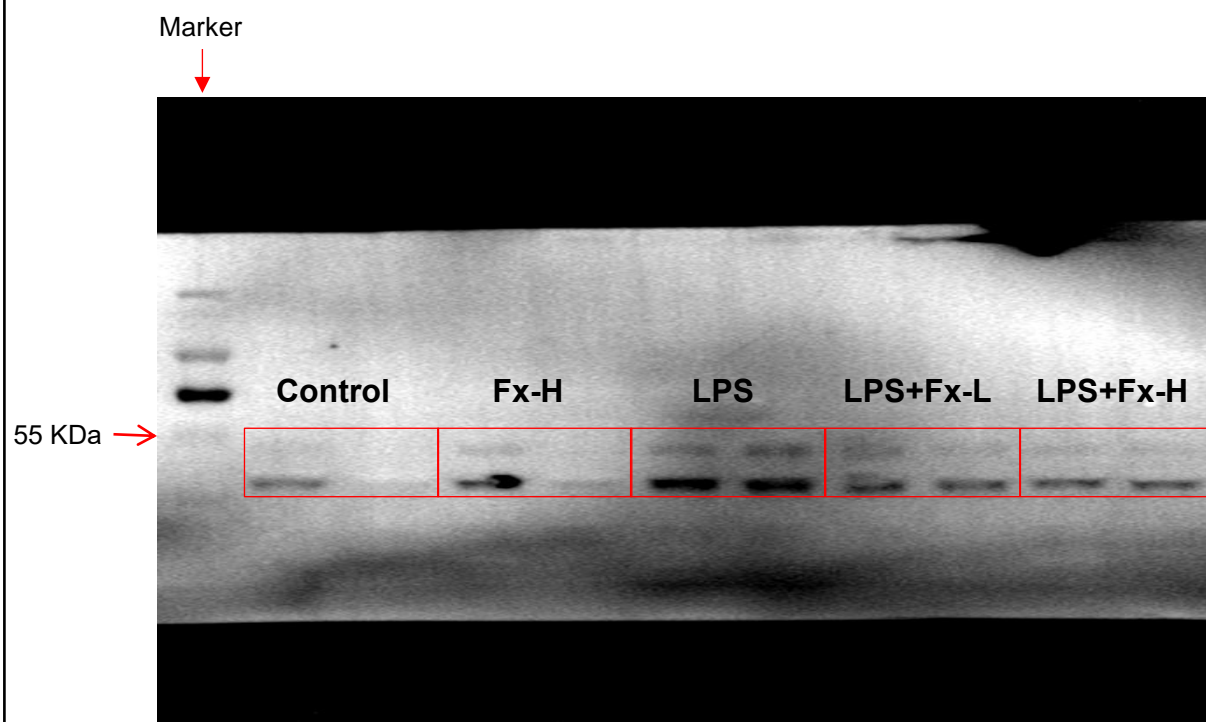

### Colonic JNK

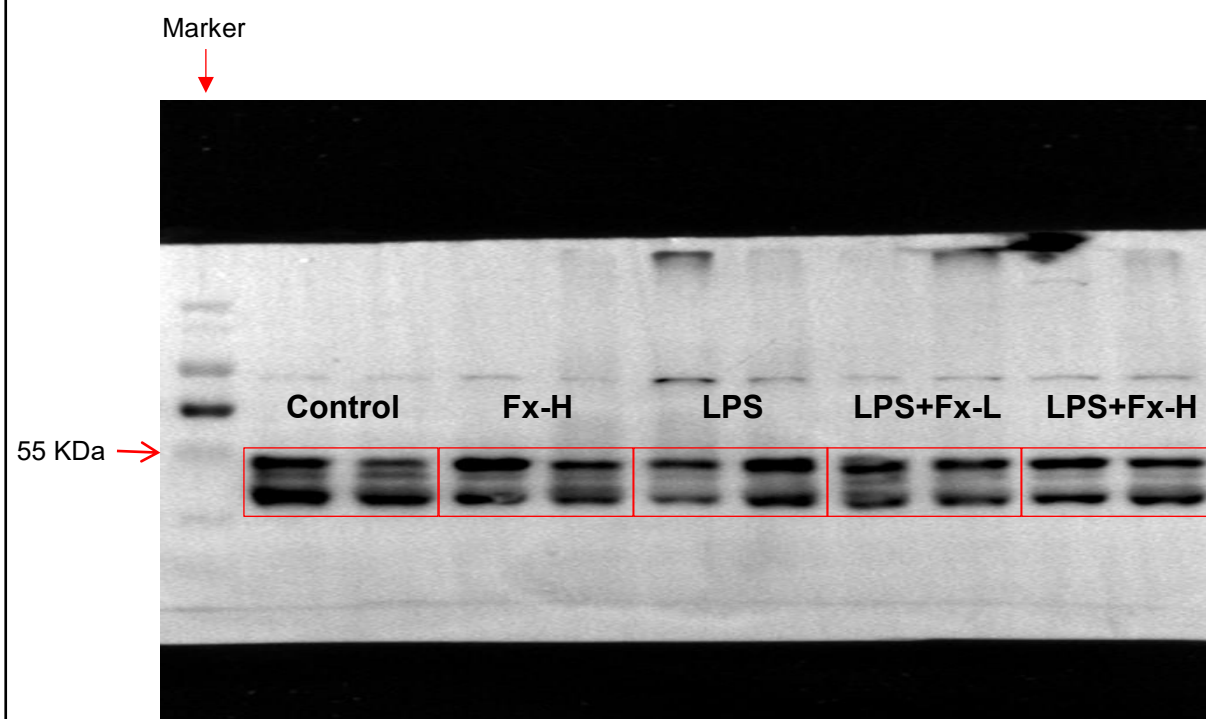



### Colonic p-p38 MAPK

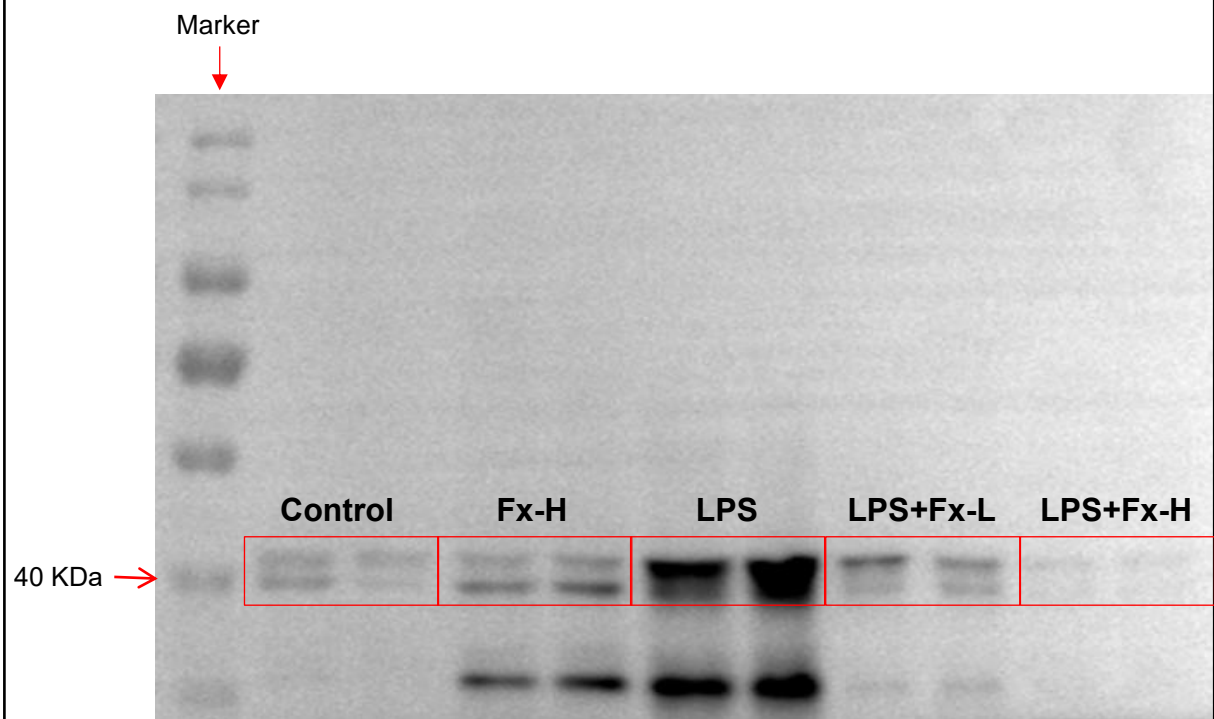

### Colonic p38 MAPK

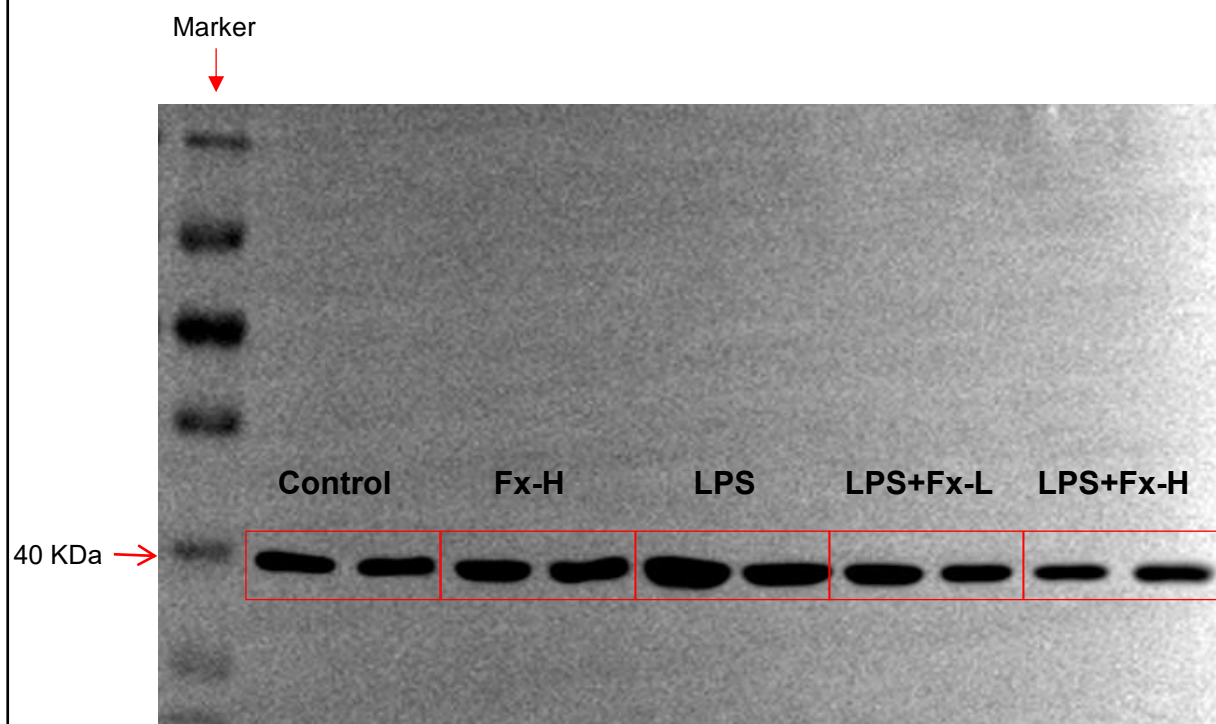



## Colonic GAPDH

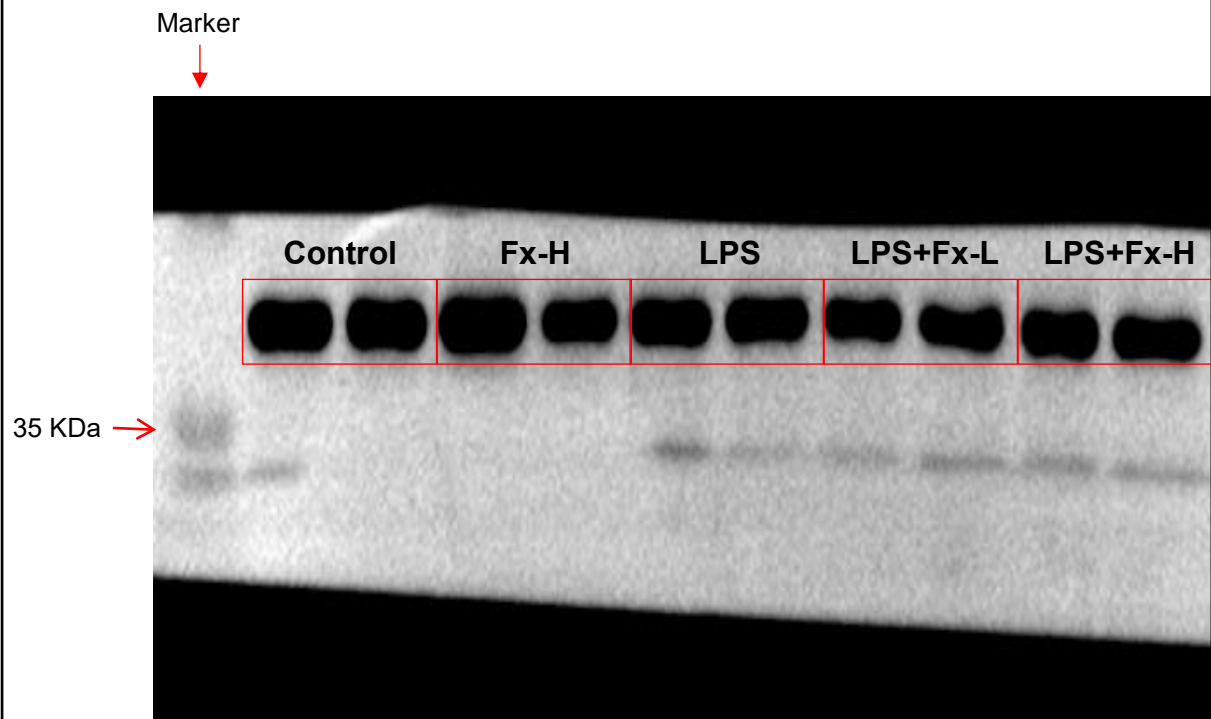

Uncropped blots for **Figure 6A**

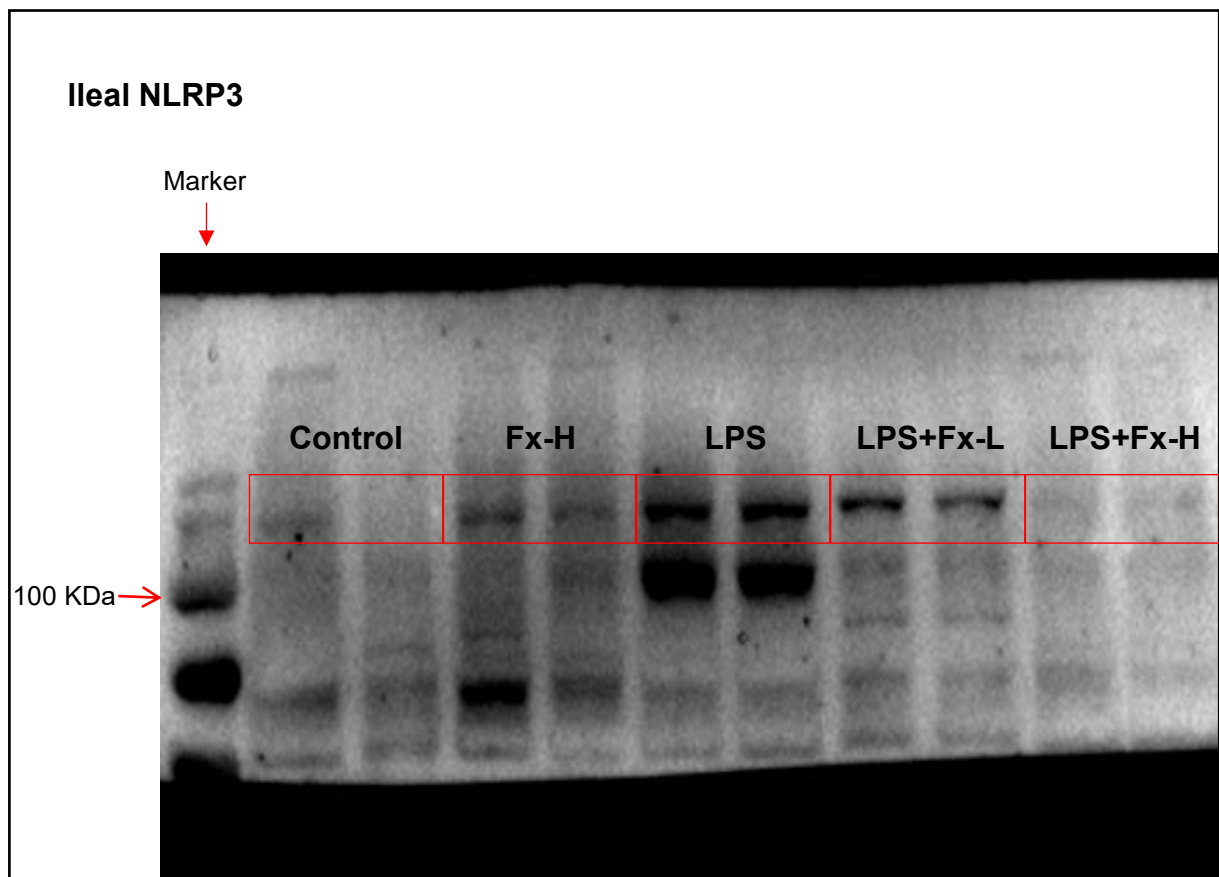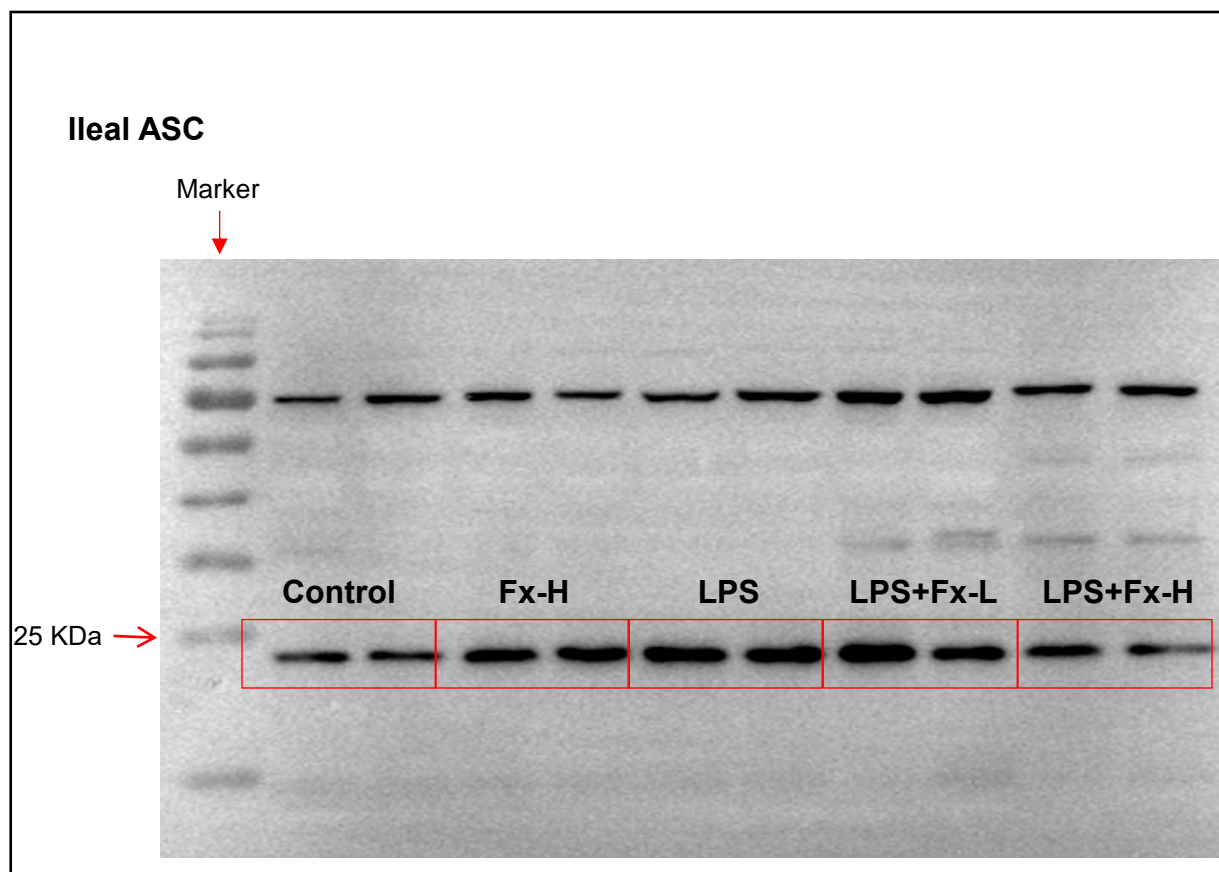

### Ileal pro-caspase 1 and cleaved caspase 1

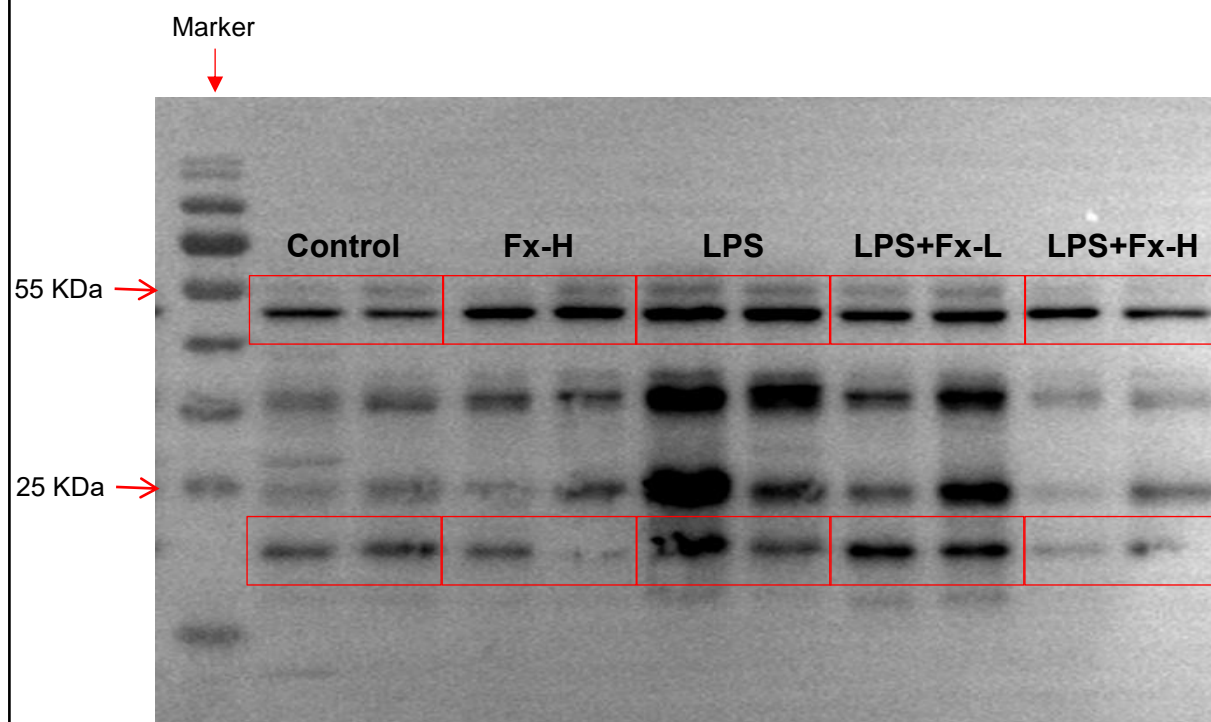

### Ileal pro-IL-1 $\beta$

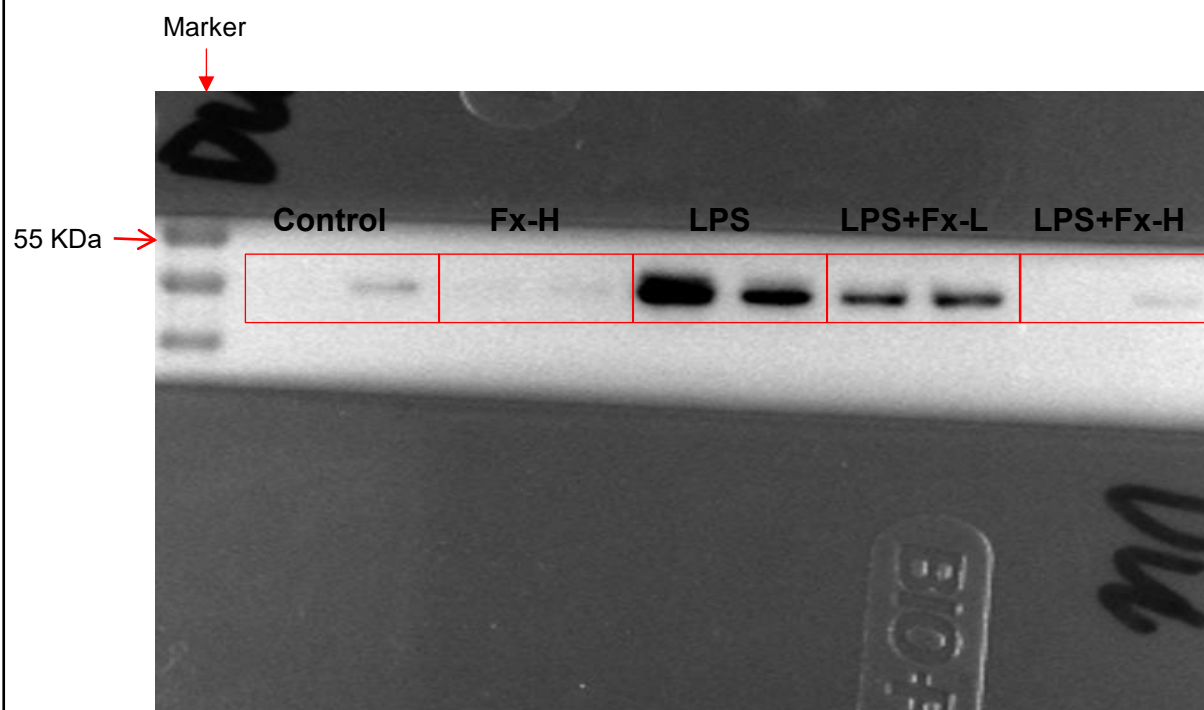

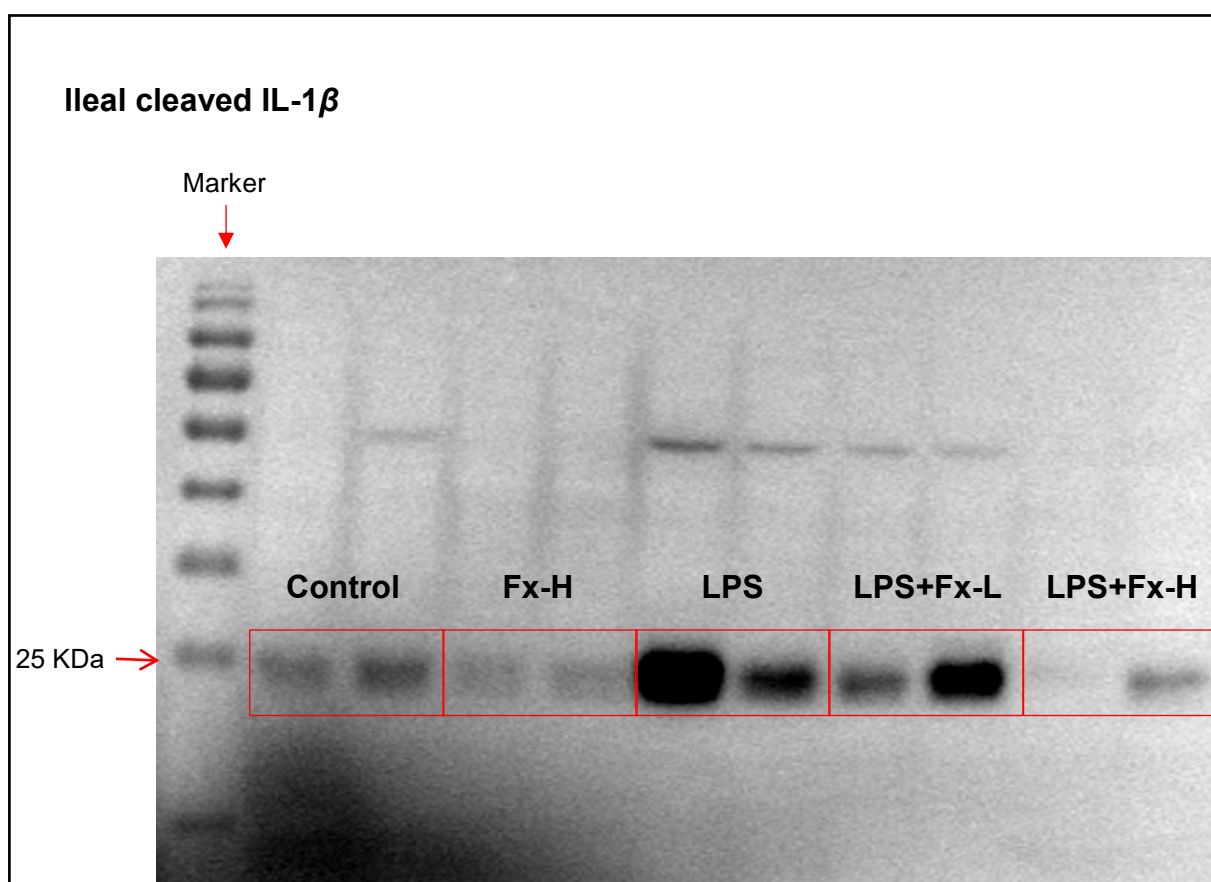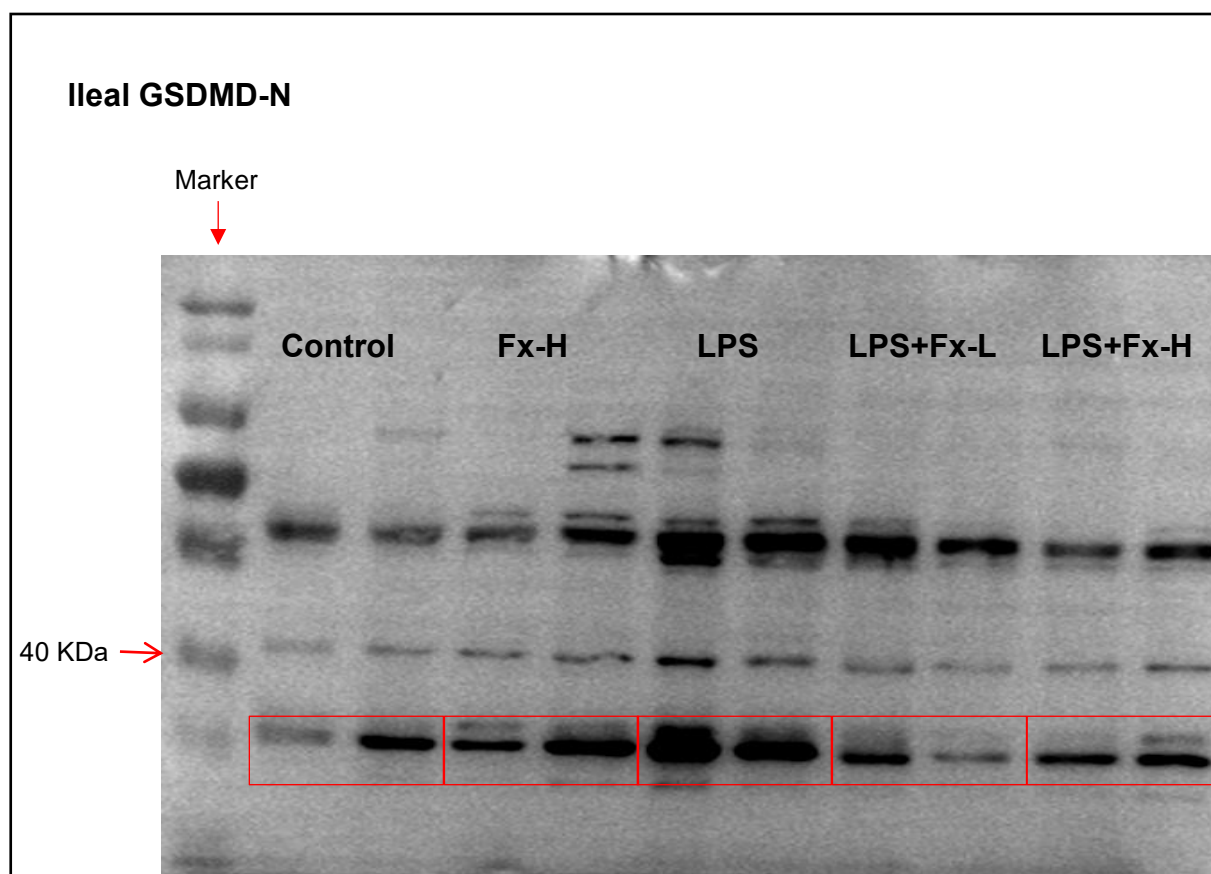

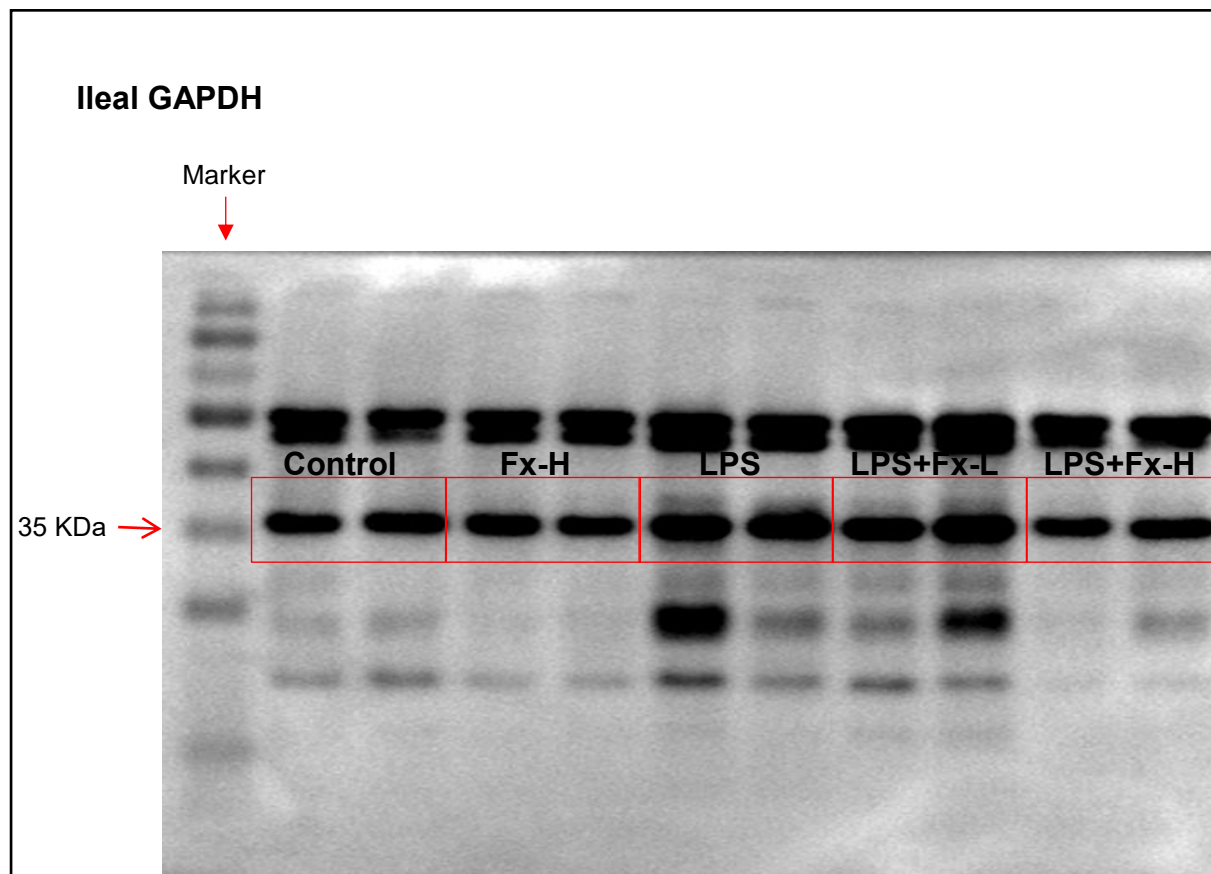

Uncropped blots for **Figure 6I**

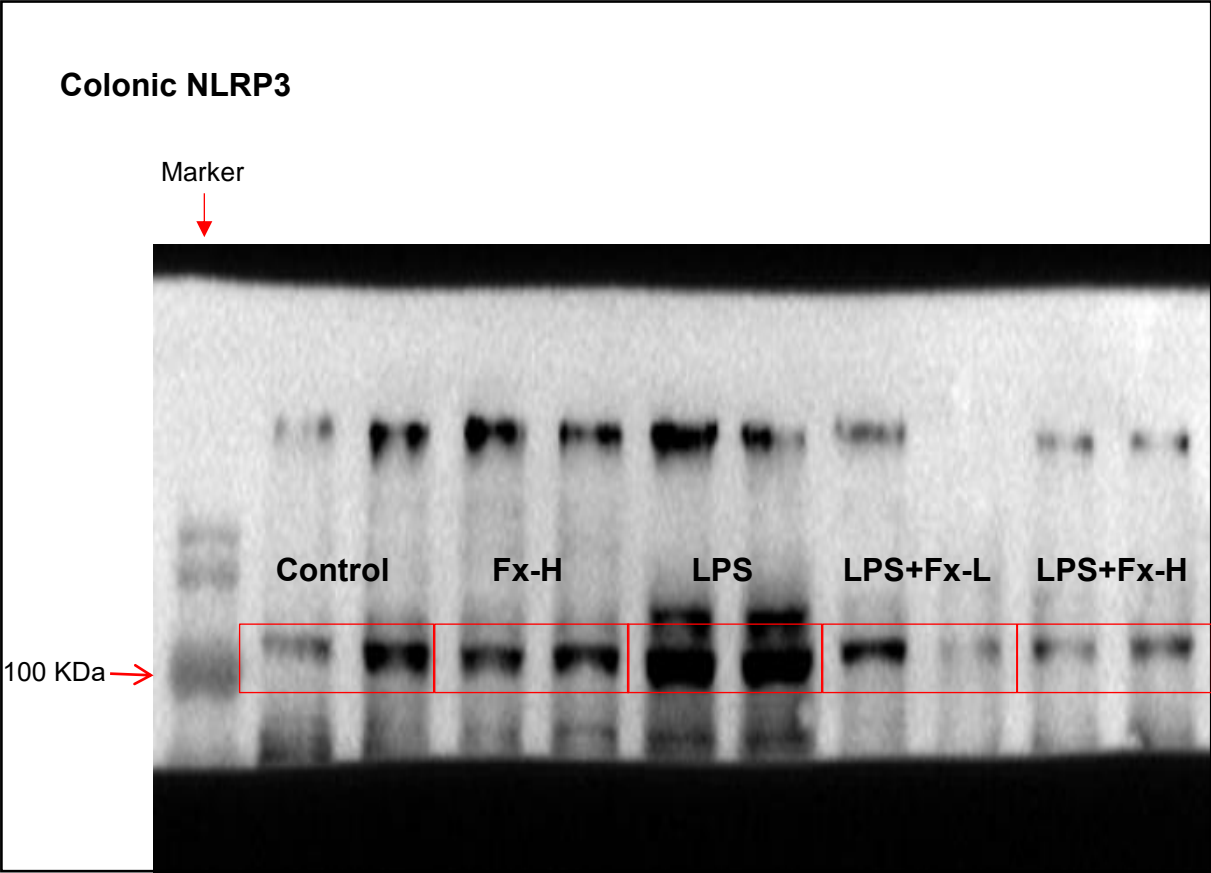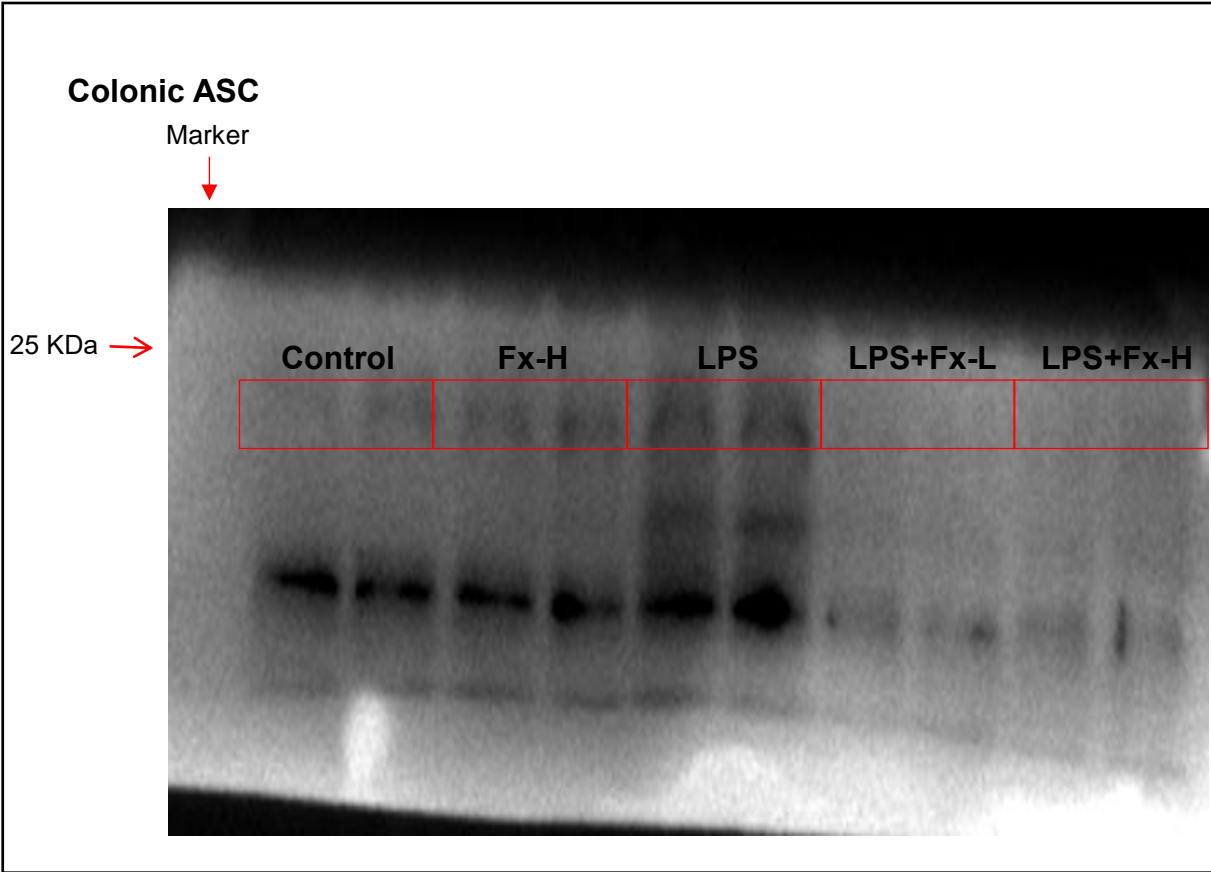



### Colonic pro-caspase 1 and cleaved caspase 1

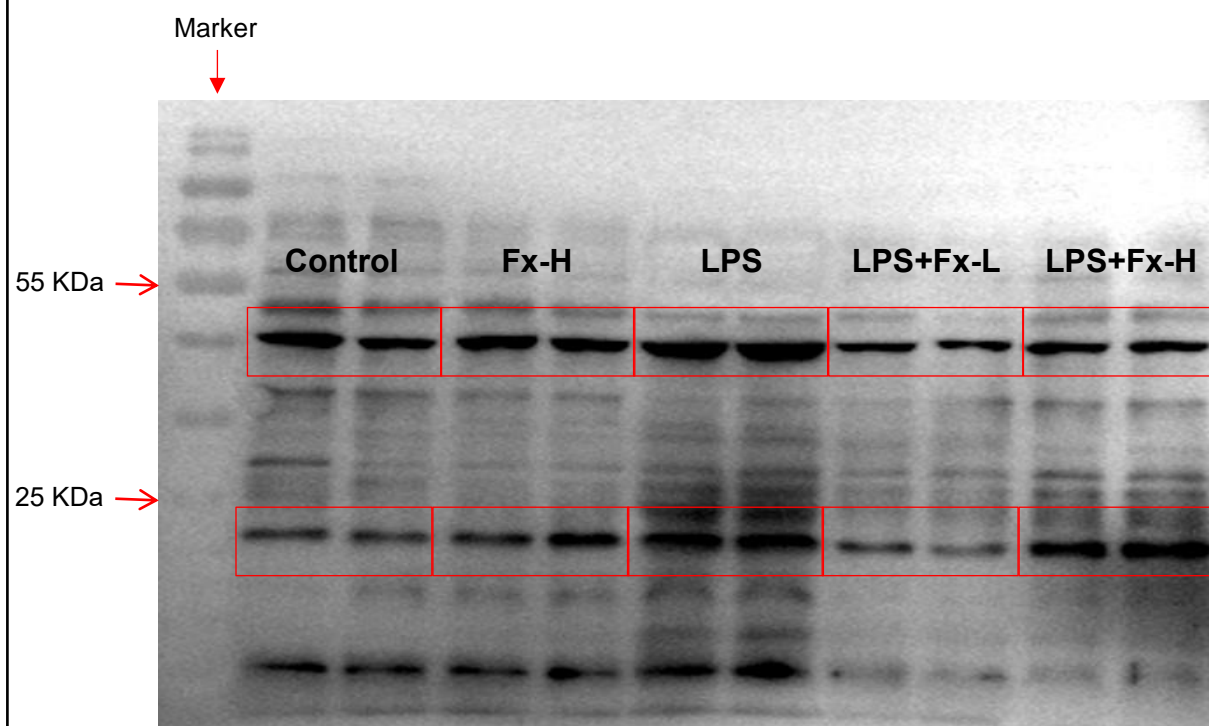

### Colonic pro-IL-1 $\beta$ and cleaved IL-1 $\beta$

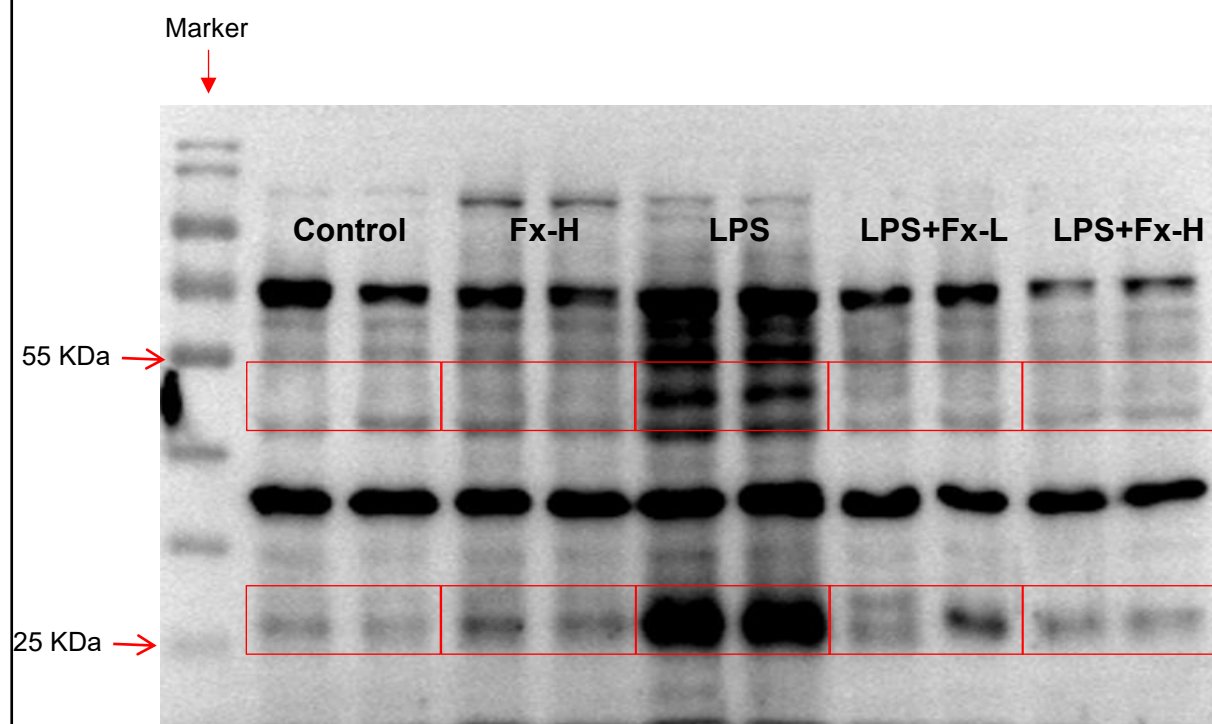

### Colonic GSDMD-N

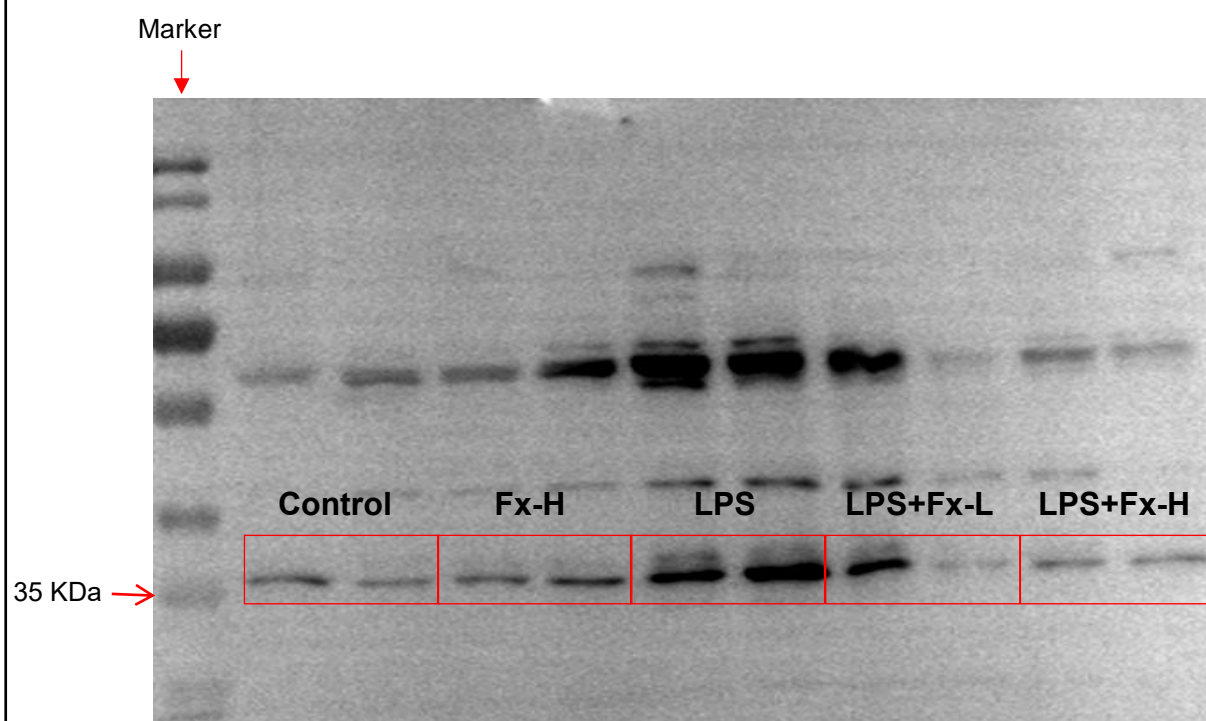

### Colonic GAPDH

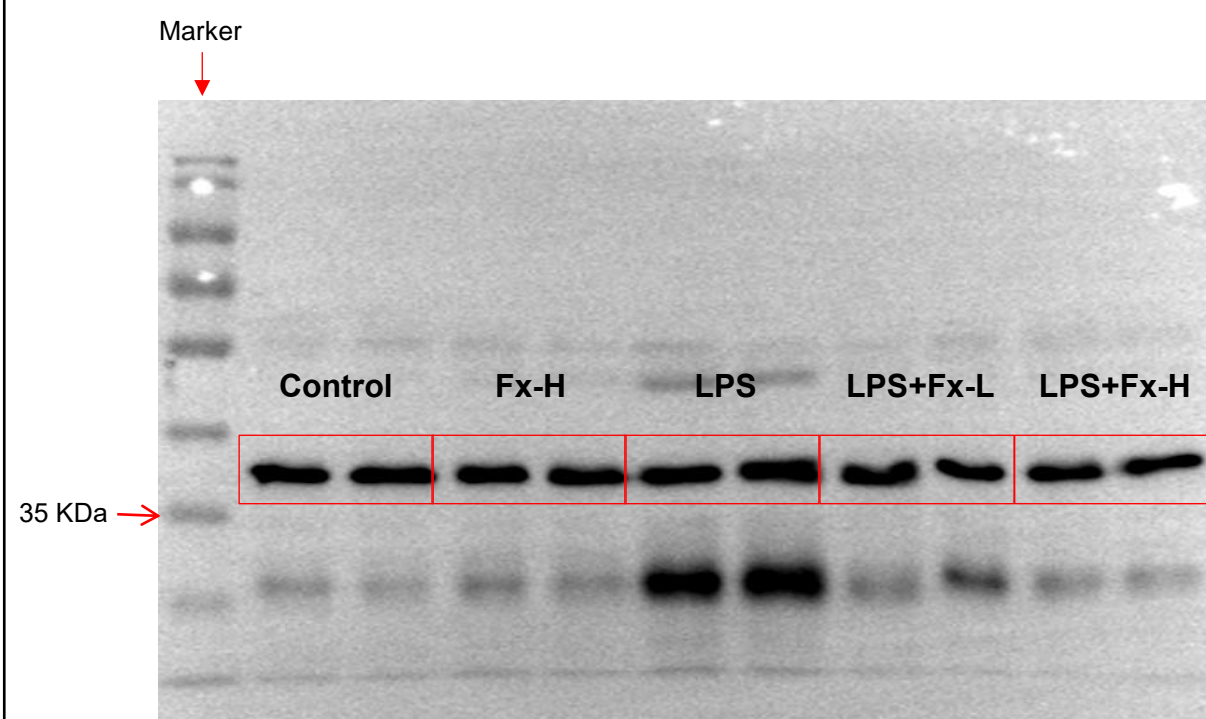



Uncropped blots for **Figure 8A**

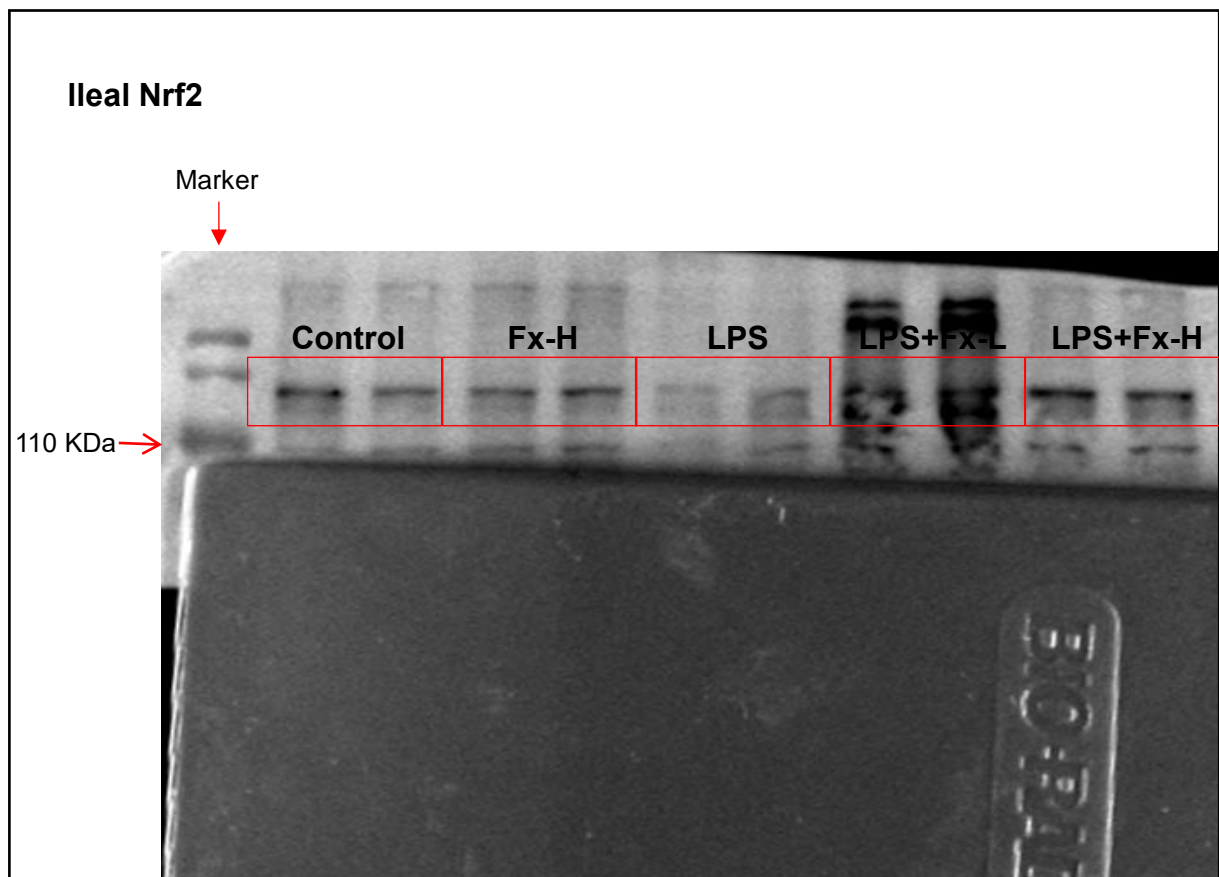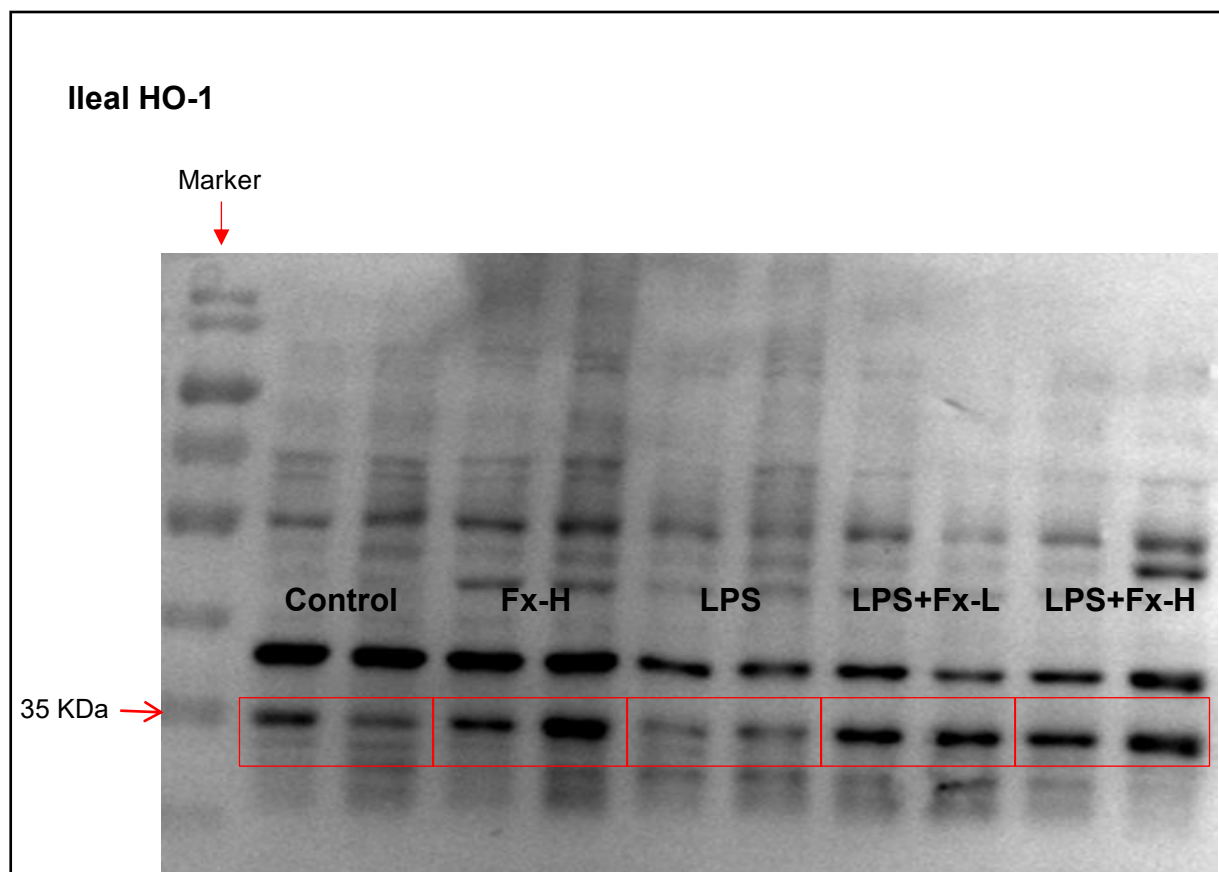

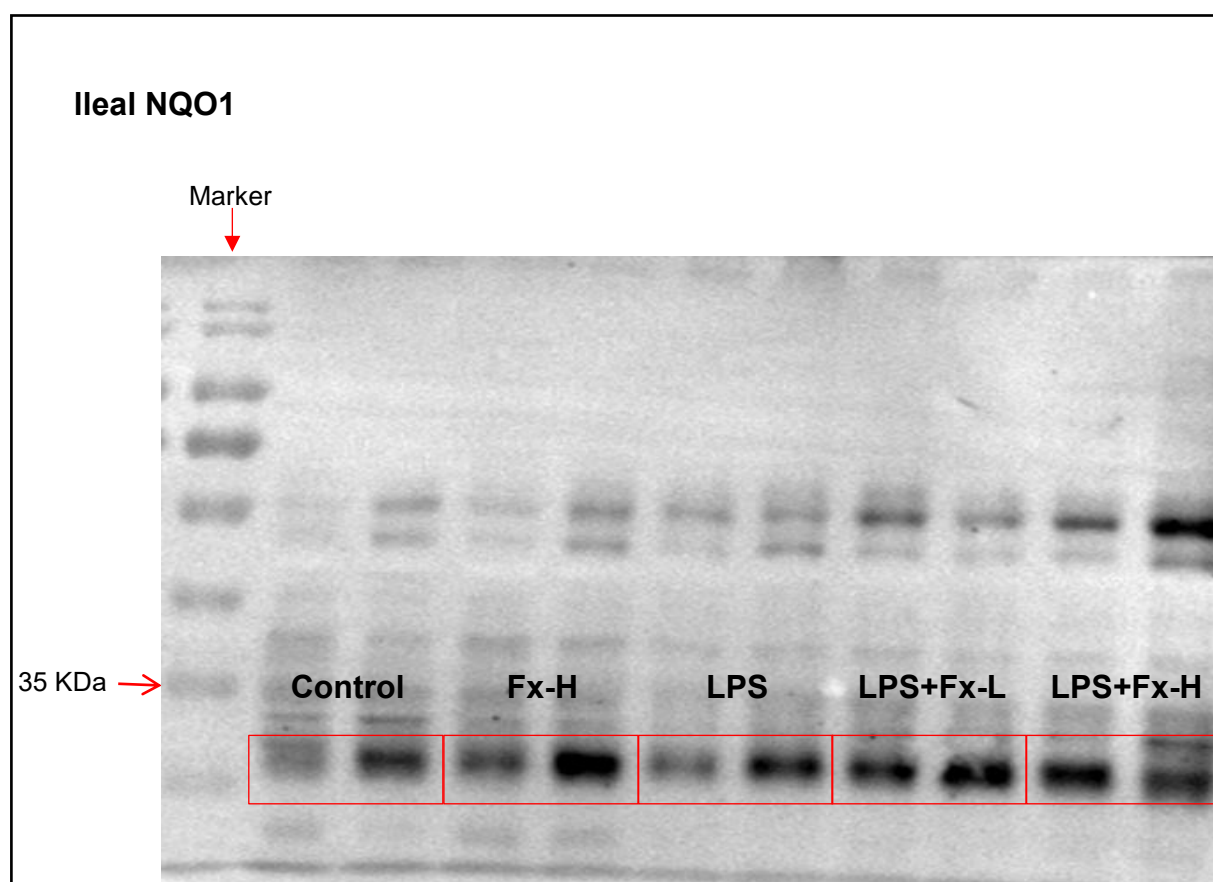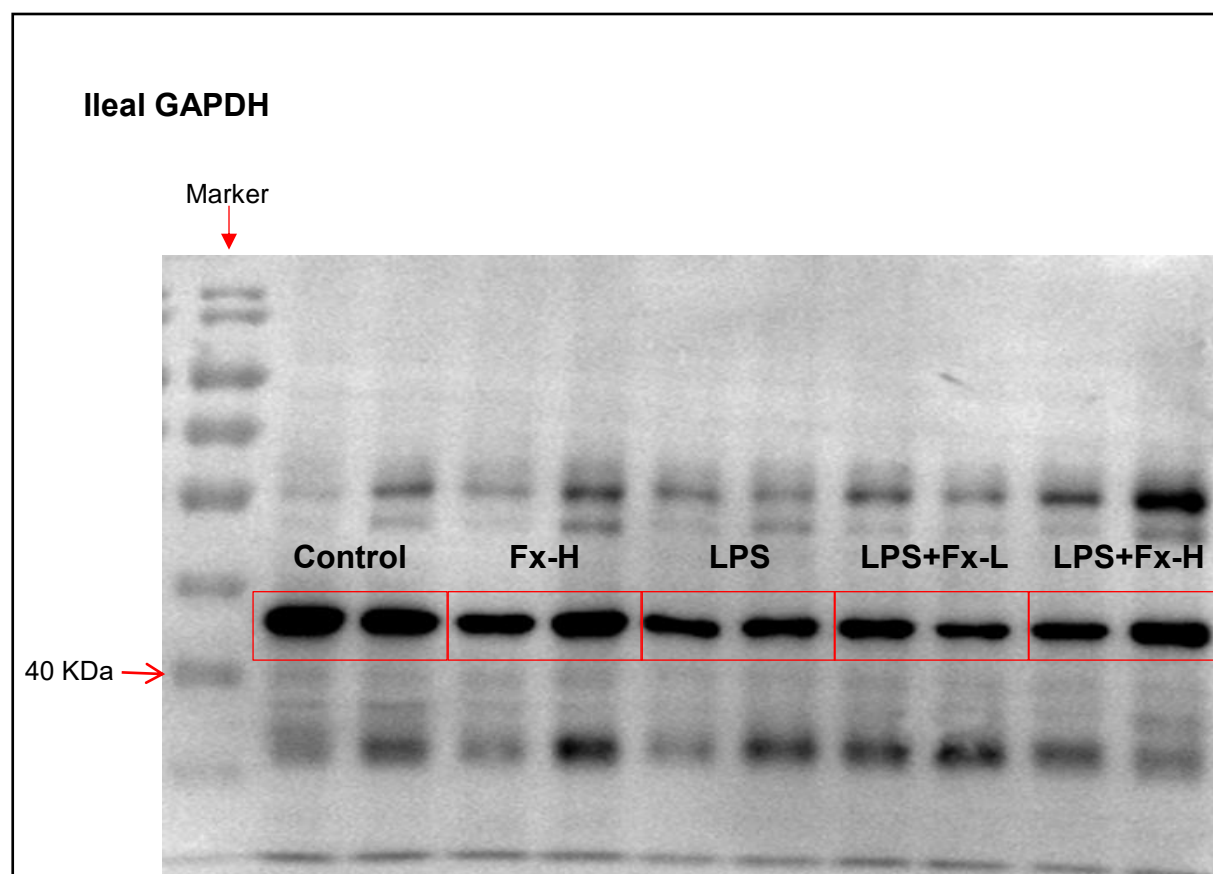

Uncropped blots for **Figure 8E**

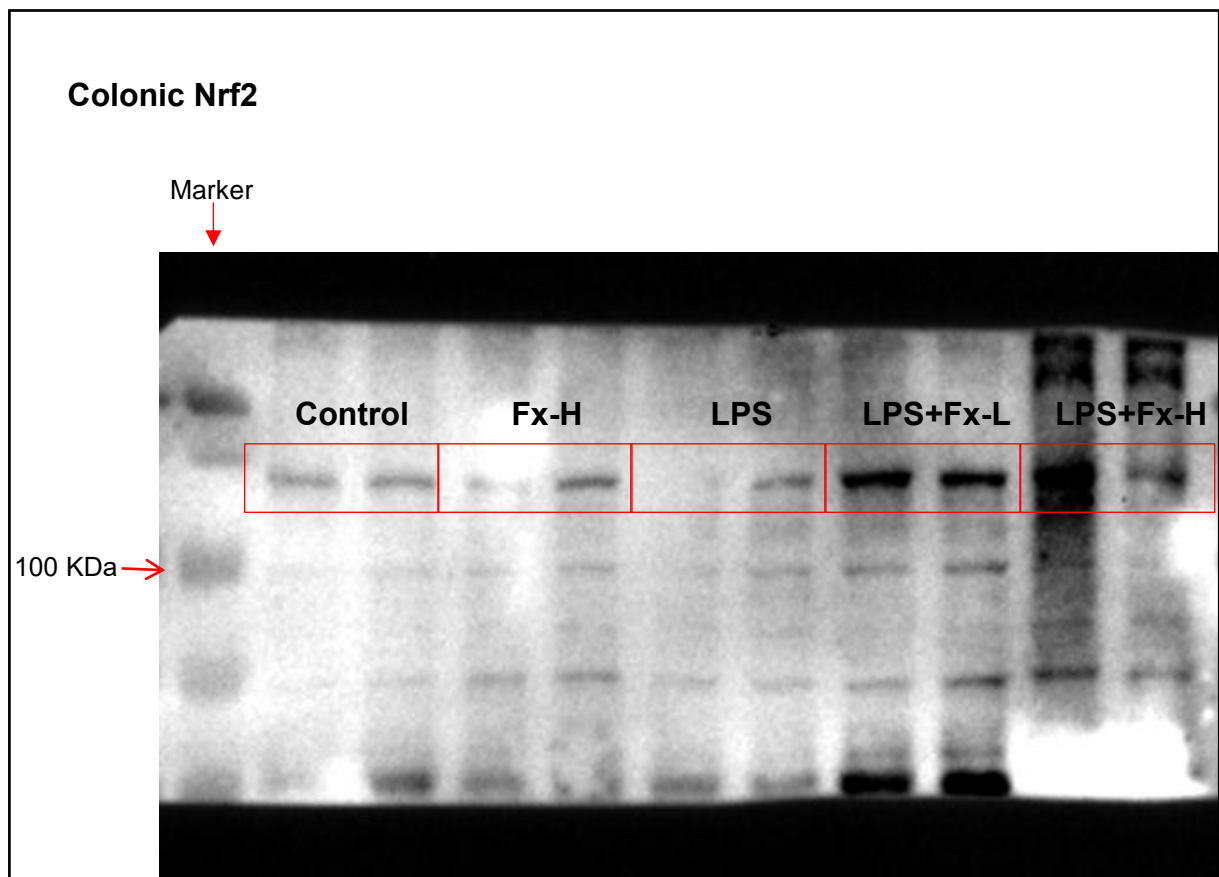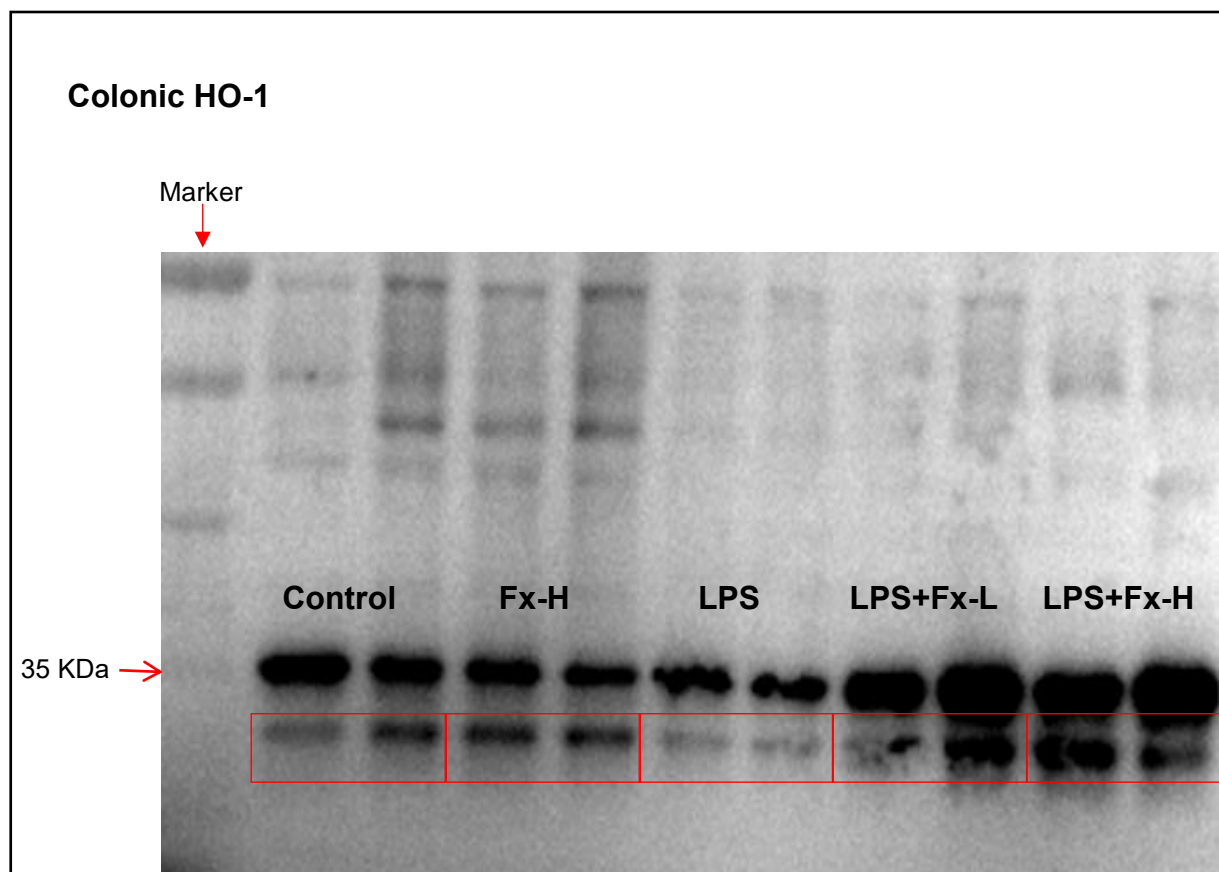

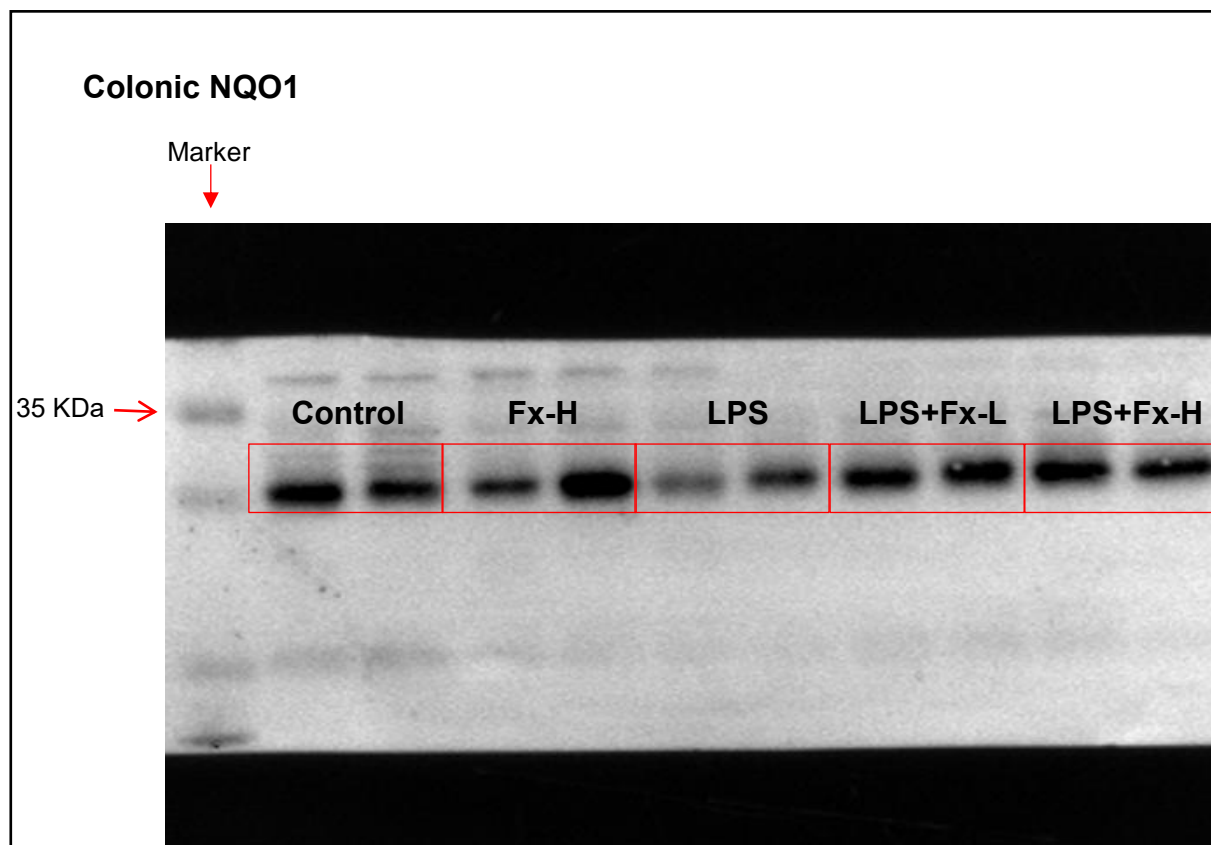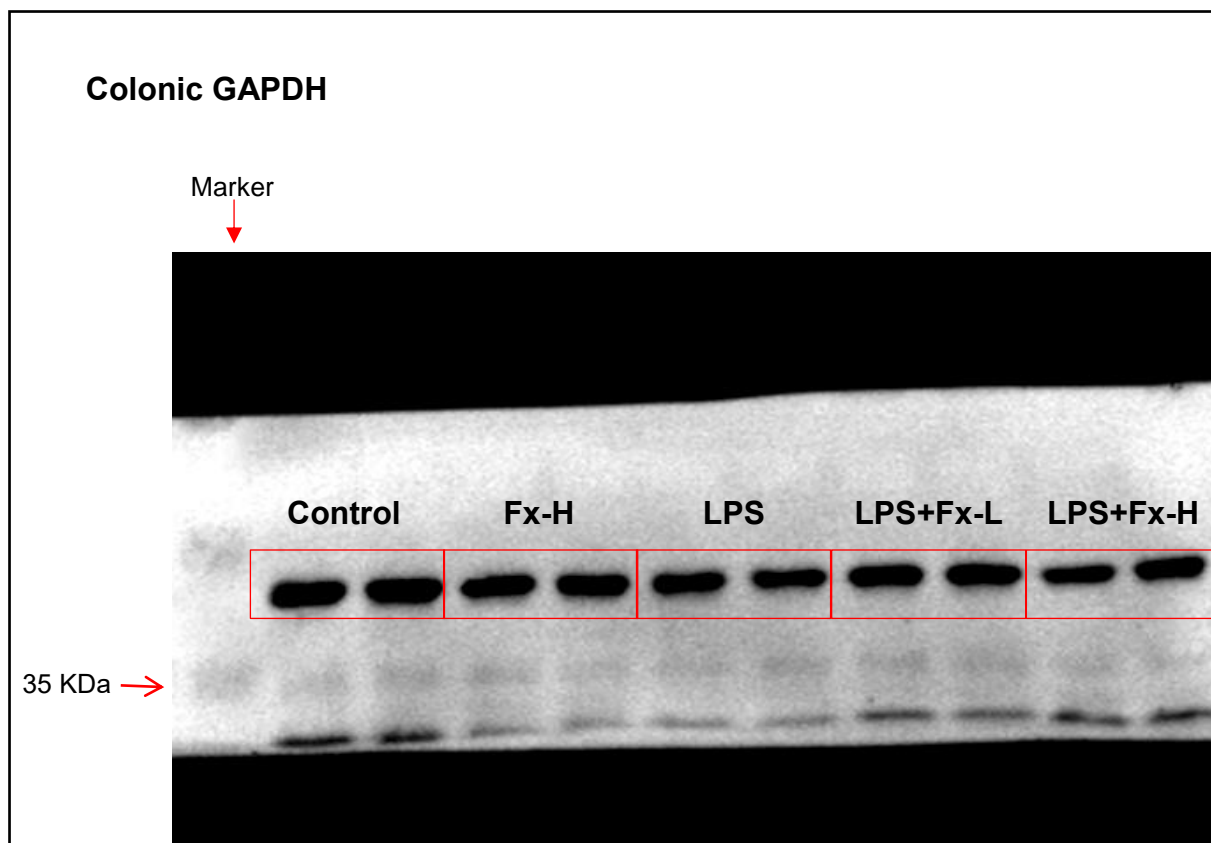

Supplement: d4fo00611a1.pdf [file d4fo00611a1.pdf]
